30 **SUMMARY/ABSTRACT**

31 Mammalian sex chromosomes encode homologous X/Y gene pairs that were retained on  
32 the male Y and escape X chromosome inactivation (XCI) in females. Inferred to reflect X/Y-pair  
33 dosage sensitivity, monosomy X is a leading cause of miscarriage in humans with near full  
34 penetrance. This phenotype is shared with many other mammals but not the mouse, which offers  
35 sophisticated genetic tools to generate sex chromosomal aneuploidy but also tolerates its  
36 developmental impact. To address this critical gap, we generated X-monosomic human induced  
37 pluripotent stem cells (hiPSCs) alongside otherwise isogenic euploid controls from male and  
38 female mosaic samples. Phased genomic variants of these hiPSC panels enable systematic  
39 investigation of X/Y dosage-sensitive features using *in vitro* models of human development.

40 Here, we demonstrate the utility of these validated hiPSC lines to test how X/Y-linked  
41 gene dosage impacts a widely-used model for the human syncytiotrophoblast. While these  
42 isogenic panels trigger a *GATA2/3* and *TFAP2A/C* -driven trophoblast gene circuit irrespective of  
43 karyotype, differential expression implicates monosomy X in altered levels of placental genes,  
44 and in secretion of placental growth factor (PIGF) and human chorionic gonadotropin (hCG).  
45 Remarkably, weighted gene co-expression network modules that significantly reflect these  
46 changes are also preserved in first-trimester chorionic villi and term placenta. Our results suggest  
47 monosomy X may skew trophoblast cell type composition, and that the pseudoautosomal region  
48 likely plays a key role in these changes, which may facilitate prioritization of haploinsufficient  
49 drivers of 45,X extra-embryonic phenotypes.

50

51 **KEYWORDS:** Turner syndrome, monosomy X, X chromosome inactivation, XCI, escape,  
52 pluripotency, trophoblast, placenta, miscarriage

53

54

55

56

57

58

## 59 INTRODUCTION

60 Placental female mammals maintain dosage parity of most X-linked genes with males via X  
61 chromosome inactivation (XCI), a process which independently evolved long non-coding RNAs  
62 (eutherian *XIST*, metatherian *Rsx*) to silence one of two X chromosomes (1). This dosage-  
63 compensation strategy was likely necessitated by attrition of the proto-Y in the heterogametic  
64 male germline of ancestral mammals following acquisition of the male-determining factor (*SRY*)  
65 (2). Yet, because some sex-chromosomal genes were selected to resist Y-attrition and escape XCI,  
66 thereby maintaining expression from two active copies in males and females alike (3),  
67 mammalian development is likely sensitive to proper dosage of these “X/Y-pair” genes (4).

68 This multi-genic dosage-sensitivity is perhaps best reflected in the pronounced rarity of live-  
69 born monosomy X in mammals that feature a long pseudo-autosomal region (PAR). Present on X  
70 and Y, the PAR is maintained via meiotic recombination in the male germline, and likewise  
71 escapes XCI in females (5). In contrast, mice feature a short PAR, as well as comparatively few XCI  
72 “escapee” genes overall (6, 7), and tolerate monosomy X with very little developmental impact  
73 (8, 9).

74 Human monosomy X (45,X) causes Turner syndrome (TS, ~1:2500 live births), which ranges  
75 from full penetrance of short stature and early, often pre-pubertal ovarian failure, to other  
76 skeletal and craniofacial changes, lymphedema of hands and feet, cardiovascular defects, and  
77 impaired hearing in about half of TS patients (10, 11). Yet, most monosomy X pregnancies result  
78 in miscarriage, estimated to account for 6-11% of all spontaneous terminations (12–15). Because  
79 the rate of detectable mosaicism for euploid cells in live-born TS is very high (~50%), but very low  
80 (~0.5%) in karyotypic follow-up of miscarried monosomy X, Hook and Warburton compellingly  
81 hypothesized zygotic monosomy X to be near-invariably lethal *in utero*, and that live-born TS  
82 results from mitotic sex chromosome loss in early embryos, which gave rise to either detectably  
83 mosaic TS, or TS with cryptic (e.g. confined placental) mosaicism (15).

84 Conversely, this would suggest that in absence of placental mosaicism, homogeneously 45,X  
85 extra-embryonic tissues would be defective in supporting conceptuses to term. Because this  
86 phenotype is not shared with the mouse, new mammalian and human *in vitro* models are needed  
87 to address this important question. While two prior reports of 45,X human embryonic and

88 induced pluripotent stem cell (hiPSC) lines pointed to lower expression of some placental genes  
89 in non-directed (embryoid body) differentiation (16, 17), the impact of monosomy X on relevant  
90 *in vitro* models of human extra-embryonic development has not been assessed.

91 To address this important question in a widely-used hiPSC-based model of the primitive  
92 syncytiotrophoblast (STB) (18, 19), we derived 45,X hiPSCs alongside isogenic euploid control  
93 lines from mosaic samples. This enables us to largely exclude the impact of autosomal variation,  
94 and leverage phased genome sequencing to quantify allele-specific dosage contributions from X  
95 and Y. While these hiPSCs trigger a *GATA2/3*, *TFAP2A/C*-mediated gene circuit (20) irrespective  
96 of karyotype, differentially-expressed genes indicate monosomy-X alters the balance between  
97 cytotrophoblast (CTB), STB and extravillous trophoblast (EVT) markers. These changes are also  
98 reflected in secretion of human chorionic gonadotropin (hCG) and placental growth factor (PIGF),  
99 and correlated gene modules are preserved in late first-trimester and term placentas. Together,  
100 our study represents the largest single source of 45,X hiPSC and isogenic euploid control lines to-  
101 date, and provides a first direct assessment of how monosomy X may impact human trophoblast-  
102 relevant gene networks.

103

## 104 **RESULTS**

105 Because the low rate of term pregnancy with 45,X conceptuses may reflect a selective  
106 bottleneck, we turned to a post-developmental model of sex chromosome loss, namely aging, as  
107 a source of mosaic human monosomy X, which by age 75 increases to ~45% and ~0.45% in males  
108 and females, respectively (21–23). In total, we reprogrammed mosaic fibroblasts from four  
109 donors (three female, one male) and validated the resulting clones in systematic fashion (Fig. 1A).  
110 Two of the female samples resulted in exclusively X-monosomic or euploid hiPSC lines, as  
111 determined by tandem repeat PCR or copy-number quantitative PCR (qPCR) at X-linked loci (data  
112 not shown). These lines were not pursued further, as our analysis aimed to exclude effects of  
113 autosomal genetic variation by comparing 45,X to matched isogenic euploid control lines of the  
114 same donor. In contrast, female (AG05278) and male (AG09270) samples resulted in both euploid  
115 and 45,X hiPSC clones (XO, XO2/8/9) from each donor (aged 65 & 67). Karyotyping (Fig. S1A)  
116 further ruled out three male-derived clones with chromosome (chr) 12 trisomy or duplications.  
117 Finally, all remaining male and female-derived lines passed high-resolution cytogenetic testing

118 (CytoSNP-850k) to rule out any other genomic copy-number variation (CNV). No other CNV calls  
119 (at minimal CNV resolution of 400 kb) were made in AG09270-derived lines, and a single 440 kb  
120 duplication in neuron-specific *OPCML* was found in all AG05278-derived hiPSCs lines and donor  
121 fibroblasts, yielding a final set of eight hiPSC clones with validated karyotypes (Fig. 1B).

122 We next characterized XCI in female-derived 46,XX clones (XX6, XX19, XX23), to confirm intact  
123 X dosage compensation. Loss of *XIST* expression is common in standard hiPSC culture, and can  
124 lead to progressive reactivation of the inactive X (Xi), referred to as Xi erosion (24, 25). We  
125 recently reported a prevalent and contiguous Xi DNA hypomethylation trajectory after loss of  
126 *XIST* expression, which we validated in two of our 46,XX (XX19/23) lines over six months of  
127 continuous passage (26). However, in early-passage and differentiation experiments described  
128 herein, all three 46,XX clones expressed *XIST* at or above female fibroblast WI-38-equivalent  
129 levels by qPCR (Fig. 1C), and by fluorescence *in-situ* hybridization (FISH) (Fig. 1D). As expected  
130 based on our and prior reports, these early passages reflect heterogeneity for *XIST* levels and  
131 associated H3K27me3-deposition on the Xi (Fig. 1E). We therefore confirmed that X-linked CpGs  
132 that best reflect Xi erosion (26) remain largely hypermethylated in all three hiPSCs lines (Infinium  
133 MethylationEPIC), indicating intact XCI maintenance inclusive to all early hiPSC passages (XX6 <  
134 p21, XX19 < p9, XX23 < p11) used in experiments described herein (Fig 1F). To enable allele-  
135 specific assessment of XCI across individual samples in subsequent RNA-seq experiments, we also  
136 performed linked-read whole-genome sequencing on the 10X Genomics platform (phased WGS  
137 to ~30x coverage), yielding a catalogue of 76,737 heterozygous variants that distinguish the X  
138 chromosomes in female-derived lines (Fig. S1B). In the mRNA-seq experiments below, we  
139 leverage these phased variants (1,056 in exons, 3' and 5' UTRs) to determine that all female 45,X  
140 clones maintained the same parental X chromosome, and to quantify escape from XCI and X  
141 reactivation.

142 We confirmed high expression of pluripotency markers by immunofluorescence (IF)  
143 staining for OCT4 and SSEA4, and low expression of markers associated with germ layer  
144 differentiation by 3' mRNA sequencing (Fig. S2A,B). All 45,X hiPSC lines expressed high levels of  
145 pluripotency genes *SOX2* and *DNMT3B* and low levels of lineage-specific genes, equivalent to  
146 their respective euploid control lines, and in line with the few 45,X lines described previously (17,

147 27–29). Several methods for derivation of trophoblast-like (TBL) cell fates from hiPSCs have been  
148 reported in recent years (reviewed in (30)), starting from either pre-implantation blastocyst-like  
149 (naïve or ground state) (31, 32), post-implantation epiblast-like (or primed) (18, 33, 34), or  
150 intermediate (extended/expanded) (35, 36) human pluripotency states. We chose a well-  
151 characterized TBL-induction method compatible with primed hiPSCs (18, 33), to ensure our  
152 validated karyotypes and DNA methylation (Fig. 1) were stably maintained. These requirements  
153 ruled out TBL-induction from naïve hiPSCs, which can suffer increased genome instability relative  
154 to primed hiPSCs (37, 38), and genome-wide loss of DNA methylation (39, 40) that includes  
155 imprinted genes (41), to which extra-embryonic development is highly dosage-sensitive (42–45).

156 Primed hiPSCs were differentiated to TBL cell fates by exposure to BMP4 and inhibition of  
157 TGFb1/activin/nodal signaling over 8 days. This widely used “BAP” (BMP4, A83-01, PD173074)  
158 model (18, 33, 34, 36, 46–48) is thought to reflect the primitive STB (18, 48), as BMP4 activates  
159 a conserved trophectodermal transcription factor (TF) circuit via *GATA2/3* and *TFAP2A/C* (20, 49,  
160 50). All BAP-treated lines formed flat epithelial sheets that gave rise to mononuclear HLA-G<sup>+</sup> cells  
161 (Fig. S3A), or progressively fused to form large syncytiated cells, seen as clustered nuclei inside  
162 Na<sup>+</sup>/K<sup>+</sup> ATPase-marked membranes (Fig. 2A). These syncytia expressed high levels of the hCG  
163 beta subunit, which is only produced by the fused STB upon implantation and is important for  
164 endometrial receptivity and maternal immune suppression (51, 52). Abnormal hCG  
165 concentrations have been associated with adverse pregnancy outcomes, including intrauterine  
166 demise and fetal growth restriction (IUGR), as well as pre-eclampsia (53, 54). All BAP-treated  
167 cells secreted high levels of hCG, with a moderate but statistically significant decrease in 45,X  
168 lines (XO, XO2/8/9) relative to their isogenic euploid controls by ELISA (Fig. 2B). Another  
169 important protein secreted from the STB, placental growth factor (PlGF) is a member of the  
170 vascular endothelial growth factor (VEGF) family, and known to be critical for proper placental  
171 angiogenesis (55). PlGF levels were also lower in 45,X relative to their isogenic euploid controls,  
172 a decrease that was statistically significant in the female panel (XX19/23 euploid vs. XO2/8/9),  
173 and in comparing all 45,X to XX19/23 and XY samples (Fig. 2C, Mann-Whitney-U  $p = 9.2e-05$ ).

174 Female euploid XX6 TBL cells however, secreted less hCG and PlGF, and fused at a lower rate  
175 than XX19/23 lines (Fig. S3B), pointing to differences among 46,XX euploid lines addressed below.

176 Fusion indices were determined in unbiased fashion via computational analysis of DNA content  
177 (Hoechst staining), and revealed no other differences that rose to statistical significance.  
178 Likewise, differences in transwell migration rates missed the significance threshold (Fig. S3C),  
179 suggesting no overt karyotype-driven differences in this important trophoblast function (56, 57).  
180 All BAP-treated lines also gave rise to migratory cells that expressed the EVT marker HLA-G with  
181 similar, albeit variable frequency (Fig. S3D).

182 To develop a more comprehensive understanding for how monosomy X may impact TBL cell  
183 fates, we performed mRNA-seq in four independent rounds of BAP differentiation. We first  
184 assessed the BMP4-induced TF circuit triggered via *GATA2/3* and *TFAP2A/C* (20), all four of which  
185 were robustly expressed (>13 vst, variance-stabilizing counts, roughly approaching log<sub>2</sub>-scaled  
186 counts). XX19/23 and XY lines expressed moderately higher levels (log<sub>2</sub>FC 0.2-0.9, p.adj ≤ 0.05)  
187 of *TFAP2A*, *PGF* and *HLA-G* than their isogenic 45,X counterparts, which was not true for XX6  
188 however (Fig. 2D). Of the TFs responding to the *GATA2/3* & *TFAP2A/C* quartet (20), matching  
189 decreases in the male and female-derived panels were confined to a handful of transiently  
190 expressed TFs, except for *MEIS1* and *EPAS1*, which were modestly decreased in 45,X lines (Fig.  
191 S4A).

192 Next, we rigorously compared expression levels of lineage markers identified in single-cell  
193 RNA-seq studies of early human and macaque embryos (58–60). A subset of the human pre-  
194 gastrulation lineage markers (59) were re-classified recently based on single-cell RNA-seq from  
195 post-gastrulation macaque embryos (60) to resolve human TE, epiblast and amniotic lineages  
196 (61). As expected, we find that levels of both trophectoderm (TE)-associated gene sets (58, 61)  
197 significantly exceed levels of all other human lineage-associated gene sets in our BAP-treated  
198 cells (Fig. S4B,C) with a median differential of +1.5-2 vst counts (~4-fold difference, see methods).  
199 We also assessed all original gene sets (58–60) against the re-classified (TE, E-AM, and EPI)  
200 markers (61), and again find that both distinct TE gene sets far exceed levels of genes associated  
201 with all other lineages, and that early STB markers (59) represent the next-highly expressed set  
202 in our data (Fig. S4C). This is important in regards to a number of purported markers of the human  
203 amnion, which despite remaining poorly defined at present, have led to the suggestion that BAP  
204 treatment of primed hiPSC induces an amniotic rather than TE cell fate (62, 63). Yet, recent



205 publications acknowledge that both naïve (+AP without BMP4) (62) and primed (36, 61) (+BAP)  
206 hiPSCs adopt TBL cell fates, and new work suggests that human trophoblast cells may  
207 differentiate through a transient amnion-like intermediate (61, 64). Our data across the full  
208 breadth of lineage-associated markers demonstrate that all of our BAP-treated lines reflect a  
209 predominantly TE and early STB-like expression profile (Fig. S4B,C).

210 Transcriptome-wide principal component (PC) analysis indicates that 45,X and euploid  
211 BAP-treated samples are clearly distinct, segregating along PC1 and PC2 largely by karyotype and  
212 donor, respectively (Fig. 2E). Surprisingly however, the XX6 euploid samples cluster with their  
213 otherwise isogenic 45,X samples (XO2/8/9), mirroring their relative decrease in hCG and PIGF  
214 levels (Fig. 2B,C). Because the predominant TS hypothesis posits a haploinsufficiency of genes  
215 that escape XCI and were maintained on the Y, we next assessed allele-resolved and overall  
216 expression of PAR genes, interspersed X-Y gene pairs (“Pair”), and X-specific genes without Y-  
217 homolog. Overall, our phased variants covered 451 X-linked genes previously assessed in a large  
218 human GTEX study and meta-analysis (65), with sufficient allelic read depth to unambiguously  
219 call XCI status for up to 226 genes. A total of 166 genes were called (inactive/escape) across all 3  
220 isogenic 46,XX lines, revealing excellent agreement overall (Fig. S5A). Of the 60 escapees we  
221 identified by allelic expression (lesser allele fraction, LAF  $\geq$  0.1, binomial  $p \leq$  0.05), 38 had  
222 previously been shown to escape XCI (65), and 4/22 remaining genes escaped across all three  
223 46,XX lines (*POLA1*, *KLHL4*, *TMEM164*, *MBNL3*). Another 6/18 remaining genes escaped in at least  
224 two 46,XX lines (*FTX*, *SMS*, *AMMECR1*, *AMOT*, *STK26*, *IRAK1*), with the remainder reaching the  
225 escapee threshold in only a single line. Of the latter, only *MBTPS2* (in XX23), and *MID1*, *FAM199X*,  
226 *ELF4* and *MIR503HG* (in XX19) escaped partially (max. LAF  $\leq$  0.3) and were also overexpressed  
227 relative to 45,X samples. Three of these genes (*IRAK1*, *MBTPS2* and *SMS*) have been reported to  
228 variably escape in human placental samples (66, 67). Overall, these data indicate that aside from  
229 new escapee candidates and partial reactivation of at most four genes in one line, all three 46,XX  
230 lines faithfully maintained XCI over the course of these experiments.

231 These allele-resolved mRNA-seq data also reveal that the active X (Xa) in XX19 and XX23 is the  
232 same X retained in all female-derived 45,X lines, whereas this copy was chosen as the Xi in the  
233 XX6 line (Fig. S5B, see flipped A and B allele counts for each gene). Curiously, seven escapees



234 common to XX19 and XX23 were expressed only from the Xa in the XX6 line, including validated  
235 escapees *MXRA5* (68), *PUDP* (69, 70), *STS* (71) and *SMS* (66), as well as *STK26*, *AMMECR1* and  
236 *AMOT* (72–74). We next queried levels of *XIST* and three other XCI-relevant non-coding RNAs to  
237 determine whether there was an association with this decreased level of escape in XX6 samples.  
238 As in hiPSC RT-qPCR (Fig. 1), *XIST* levels were higher in XX6 than XX19/23 TBL cells, but missed  
239 the significance threshold (Fig. 2F,  $p_{\text{adj}} = 0.22$ ). There was no difference in two other X-linked  
240 non-coding RNA levels (*XACT*, *JPX*) amongst these female euploid TBL cells, but XX19/23-specific  
241 escapee *FTX* was expectedly higher than in XX6.

242 In standard differential expression, each of the XX19/23-specific escapees was also  
243 significantly lower in the XX6 line ( $p_{\text{adj}} \leq 0.05$ ,  $\text{abs}(\log_2\text{FC}) \geq 0.3$ ), whereas only XX6-specific  
244 escapee *SMC1A* was significantly higher (Fig. S5C). We also found many of PAR and X/Y pair  
245 (“Pair”) genes to be significantly decreased in XX6 relative to XX19 and XX23 euploid lines (Fig.  
246 3A, S5C). Because the relative difference ( $\log_2\text{FC}$  panel and boxed vst differential heatmap) in  
247 these groups of escapees between XX6 and 45,X samples (XO2/8/9) was less pronounced than  
248 between XX19/23 and these X-monosomic lines (Fig. 3A, Fig. S5C), it was plausible that escapees  
249 across the XX6 Xi were repressed, rather than *cis*-acting variants reducing escape in each of these  
250 genes individually. In line with this interpretation, the X was significantly hypermethylated in XX6  
251 hiPSC relative to XX19/23 lines (Fig. 3B), and >10% of X-linked promoter CpGs were differentially  
252 hypermethylated in the XX6 line (Fig. 3C,D). Importantly, this pattern most closely matches  
253 chromosomal probe density, and is significantly different (Kolmogorov Smirnov, KS test Fig. 3C)  
254 from the transition-specific trajectory we previously reported during Xi erosion (26). These data  
255 indicate that relative to XX19/C23, the XX6 Xi is hypermethylated (Fig. 3D, median +0.15 in DMP  
256  $\beta$  value) across its entire length, including over differential escapees, and may suggest that  
257 variance in *XIST* levels contributes to variable escape. In summary, while differential and allelic  
258 expression analyses demonstrate that XCI remained virtually intact across all three female  
259 euploid TBL sets, XX6 samples revealed excessive repression of escapees across the Xi, relative  
260 to XX19 and XX23. Whether the mechanism of this repression rests on genetic variants boosting  
261 *XIST* expression, spreading or silencing will be addressed elsewhere.

262 The observation that XX6 TBL clustered with 45,X cells and phenocopied their significant  
263 decrease in hCG and PIGF secretion may reflect the consequences of their reduced escape from  
264 XCI, consistent with the haploinsufficient monosomy X hypothesis. We therefore included XX6  
265 samples as a separate condition labeled by Xa identity (female-derived: Xa1 vs. Xa2, male: Xa3)  
266 throughout this analysis. Median expression of PAR, Pair and X-specific escapees in XX19 & XX23  
267 (“Xa1\_fem\_XX”) but not XX6 (“Xa2\_fem\_XX”) is significantly higher than in female 45,X  
268 (“Xa1\_fem\_X”) lines, which is also true for PAR genes in the male panel (Fig. 3E, normalized to  
269 autosomal median). Comparing X:autosome (X:A) ratios across gene categories (Fig. 3F), we also  
270 find that genes subject to XCI are fully dosage compensated across male and female samples (X:A  
271 fpkm ratio of 1). This is consistent with the Xa hyperactivation hypothesis (75, 76), which posits  
272 that single-copy X-linked genes evolved to match transcription of autosomal genes that are  
273 expressed from two alleles. Interestingly, PAR, Pair and X-specific escapees are expressed at  
274 significantly higher levels (X:A fpkm ratio > 1), even when present in single-copy in 45,X samples.  
275 This result suggests that genes that evolved to escape XCI tend to also be expressed from the Xa  
276 well above average autosomal gene levels.

277 We then performed a systematic assessment of differentially expressed genes (DEGs),  
278 comparing: (1) isogenic X1 female euploid and 45,X samples (“fXO”), (2) isogenic male euploid  
279 and 45,X (“mXO”), and (3) a non-isogenic male euploid to female XO samples (“XY-fXO”).  
280 Altogether over 5000 genes were found to be differentially expressed ( $p_{\text{adj}} \leq 0.05$ ,  $\text{abs}(\log_2\text{FC})$   
281  $\geq 0.3$ ) in at least two of these comparisons (Fig. 4A). As expected, these DEGs clustered samples  
282 by karyotype, but also featured highly significant overlap and concordance in direction (Fig. 4A),  
283 including 936 concordant DEGs out of 1283 common to all three comparisons (73% concordant,  
284 sign test  $p = 8.2 \times 10^{-285}$ ). We next performed gene set enrichment analysis (GSEA), ranking genes  
285 by their individual fXO, mXO or XY-fXO DESeq2 Wald statistic, or the mean of their quantile-  
286 normalized scores (“aveXO”). As an additional control, we also ranked genes by the Wald statistic  
287 comparing karyotypically-identical 45,X samples across donors (“XOXO”). Expectedly, chrY and  
288 chrXp22 were recovered as significantly reduced in male XY-relative and all comparisons,  
289 respectively, alongside other chromosomal region-specific enrichments (Fig. S6). Among the  
290 computational modules of MsigDB, the placental gene module (#38) was the top gene set

291 reduced in across all 45,X comparisons, and from a large human fetal single-cell RNA-seq dataset  
292 (77), three trophoblast-related gene sets are among the 15 most commonly reduced lineage-  
293 associated sets (Fig. S6). Interestingly, the Wikipathway (Fig. 4B), Reactome (Fig. S6), Hallmark  
294 and other MsigDB collections, point to impaired NRF2, cholesterol metabolism and estrogen  
295 signaling, all of which are important for placental function (71, 78–80). These terms were also  
296 significantly enriched in a recent transcriptome analysis of primary EVT and CTB (81), alongside  
297 gene sets relating to the cell cycle. Indeed, several of our significantly increasing terms related to  
298 the primary cilium (Fig. 4B: ‘Ciliopathies’, ‘Joubert Syndrome’; Fig. S6: ‘Anchoring of the Basal  
299 Body’, ‘BBSome-mediated cargo-targeting to cilium’ among others). The scale of this enrichment  
300 is clearly appreciable in the biological process (BP) and cellular component (CC) gene ontologies  
301 (GO), where proliferation, splicing and translation related categories are generally upregulated  
302 in 45,X TBL cells, but the two top terms (BP: ‘Cilium assembly’, ‘Cilium organization’, CC:  
303 ‘Centriole’ and ‘Ciliary basal body’) represent the primary cilium by some margin (Fig. 4C, Fig. S6).  
304 Among down-regulated gene sets, we find terms relating to the lysosome, autophagy,  
305 transmembrane transport, immunity, lipid and steroid metabolic processes among others (Fig.  
306 S6). The contrast between increased ciliary genes and decreased lysosomal genes in both female  
307 45,X (Fig. 4D) and male 45,X (Fig. 4E) is particularly striking. Recent reports show the primary  
308 cilium is important for proper human trophoblast invasion and migration (82, 83). The primary  
309 cilium also has an inverse relationship with NRF2 (84–86), and NRF2 can activate PIGF expression  
310 directly (87). Indeed, NRF2 has been linked with birth outcomes in humans (78, 80) and mouse  
311 (79, 88–90). Likewise, cellular hallmarks of autophagy have been reported in late first trimester  
312 placenta (91, 92), and impaired autophagy has been implicated in recurrent and early miscarriage  
313 (93, 94).

314 To further clarify the relationships between these biological processes, we performed  
315 standard expression-trait correlation, and weighted co-expression network analyses (WGCNA)  
316 (95). First, we assessed how the levels of cell cycle and cell type markers (Fig. S4B,C), as well as  
317 PAR, Pair, X-specific, and all combined escapees (“All”), correlated with hCG and PIGF secretion  
318 (in matched RNA-seq & ELISA experiments, Fig. 2). “All” escapee, and PAR gene levels in  
319 particular, were highly and significantly correlated with hCG and PIGF secretion, as well as STB

320 and EVT cell fates (Fig. 5A), whereas markers of cell cycle, CTB, and other proliferative cell fates  
321 correlated with each other. Unsurprisingly, STB and EVT cell fates anti-correlate with cell cycle  
322 and CTB markers, as STB and EVT arise from proliferative CTB but exit the cell cycle upon,  
323 respectively, fusion (96, 97) and maturation (81, 98).

324 Next, we performed WGCNA across all 32 BAP samples, which cleanly segregated by  
325 karyotype, except for XX6 samples that expectedly clustered with their 45,X counterparts (Fig.  
326 S7A). Plotted over DeSEQ2's Wald scores, and gene-specific Pearson coefficients with hCG and  
327 PIGF levels (Fig. 5B), we observe a signed network of 16 modules that separates genes into two  
328 groups: Group 1 genes (left side) largely correlate with DEGs increasing in 45,X samples and anti-  
329 correlate with hCG and PIGF secretion, whereas group 2 genes (right side) co-correlate with DEGs  
330 decreasing in 45,X and hCG and PIGF levels. Strikingly, group 1 genes correlate with cell cycle and  
331 CTB markers and anti-correlate with STB and EVT markers, whereas the inverse is true for group  
332 2 genes. These data suggest that the network is shaped by mutually exclusive cell fates. To  
333 determine which specific modules were significantly driven by the contrast between euploid vs.  
334 45,X expression, we quantified the degree and significance of their preservation in a subset of  
335 exclusively 45,X samples and a mixed control dataset of equal size. Preservation (Z) scores of  
336 modules representing over two-thirds of all genes show a decrease by 20-80 standard deviations  
337 in the 45,X-only dataset relative to the mixed karyotype set (Fig. S7B). Correlating each module  
338 to traits of interest (Fig. 5A), we find the same set of modules to be strongly anti- or co-correlated  
339 with euploidy, PAR expression, hCG & PIGF secretion (Fig. S7C).

340 To test whether these modules are recovered in independent BAP and primary placental  
341 samples, we performed module preservation analysis against RNA-seq datasets from another  
342 hiPSC-based BAP model, for pre-eclampsia (99), first trimester chorionic villi samples (CVS) (69),  
343 and two WGCNA studies on placental samples at term (100, 101). Remarkably, the same 45,X –  
344 euploid contrasting modules (Fig. S7B,C) are also moderately to highly preserved in primary  
345 placental samples, irrespective of (fetal) sex or birth weight categories (Fig. 5C). Because higher  
346 CTB and cycling markers correlated with monosomy X in our WGCNA modules (Fig. S7C) and  
347 standard correlation analysis (Fig. 5A), we interpret this high level of preservation to reflect  
348 variable cell type composition (eg. CTB vs. STB) that is inherent in the sampling of first trimester

349 CVS, and term placenta. Sampling of any primary tissue is necessarily variable in cell type  
350 composition, and this variance is frequently captured in WGCNA (102). Here, in the context of  
351 our BAP model, gene modules preserved in CVS and placental samples may suggest that  
352 monosomy X hinders or delays commitment of cycling BAP-derived CTB-like cells to post-mitotic  
353 STB and EVT cell fates, thereby increasing CTB marker representation and continued expression  
354 of cycling markers. Indeed, our WGCNA modules are most strongly preserved in the first-term  
355 trimester CVS, in which proliferation and cell fate commitment are likely even more variable than  
356 in term placenta (Fig. 5).

357 We also tested whether modules were over-represented for gene sets assessed in the  
358 differential expression analysis. We recovered many similar terms (Fig. S8) relating to cell cycle  
359 and primary cilium (blue, yellow), translation, autophagy and metabolism (brown, yellow),  
360 membrane-anchored signaling pathways (green), immune regulation (midnightblue),  
361 adipogenesis and the lysosome (turquoise). Among the human fetal single-cell cell type terms,  
362 we again find three trophoblast gene sets (brown, turquoise), overall indicating strong overlap  
363 with enriched terms from differential expression (Fig. 4, S6), but providing module-level  
364 resolution of cellular functions.

365 Finally, to implicate the dosage of specific X/Y-linked gene classes in TBL differentiation,  
366 we first tested which modules featured an over-representation of PAR, Pair or X-specific  
367 escapees. The green module was significantly enriched ( $p \leq 0.05$ ) for all escapees as one class  
368 (“allESC”), escapees without Y-homolog (X-specific), and X-linked X/Y pair genes, whereas PAR  
369 genes were most over-represented in the black and turquoise modules. This latter module was  
370 of particular interest because it was also highly enriched for genes from MsigDB’s placental gene  
371 module (#38) and human fetal EVT markers (Fig. S8), correlated strongly with TE, STB and EVT  
372 markers identified across numerous early human embryonic studies, as well as hCG and PIGF  
373 levels, and best reflected euploidy and escape from XCI (Fig. 5B, S7C). Importantly, the turquoise  
374 module was also the most preserved in first trimester and term placental RNA-seq samples (Fig.  
375 5C).

376 To identify potential X-linked drivers strongly associated with specific modules, we  
377 determined the degree of correlation between each individual gene with its module eigengene

378 (averaged module expression profile across samples). Raising this coefficient (kME) to the same  
379 power as the network, and plotted over the degree of connectivity between genes, we find that  
380 PAR gene *ZBED1* is the top X/Y-linked hub gene in the turquoise module, ranking 272th of 3559  
381 genes (kME = 0.92) in the module overall. Additionally, other PAR genes (*PPP2R3B*, *GTPBP6*,  
382 *AKAP17A* and *CD99* > 0.8 kME) and escapees repressed in XX6 ranked highly in this module (kME  
383 0.86 – 0.7 for *AMOT*, *PUDP*, *SMS* & *STS*). In summary, our WGCNA analysis indicates that PAR  
384 expression most strongly reflects placental gene expression in the TBL (BAP) model, and may  
385 serve to prioritize a core set of X/Y-linked genes for follow-up in other *in vitro* models of human  
386 extra-embryonic development.

387

## 388 **DISCUSSION**

389 As a leading cause of spontaneous termination in humans (15), monosomy X can serve as  
390 a penetrant genetic model for miscarriage. Few genome-wide association studies on  
391 spontaneous or recurrent miscarriage have been published to-date (103–105), which face the  
392 additional challenge of accounting for and excluding embryonic/fetal karyotypic changes (106,  
393 107). Characterizing the impact of monosomy X using *in vitro* human cell models may therefore  
394 provide a complementary approach towards implicating cellular functions and pathways in  
395 miscarriage.

396 The hiPSC BAP model (18) used herein has previously revealed sex-divergent expression  
397 patterns (46), addressing another important question in trophoblast biology (108–110). In  
398 contrast, we applied this model to identify TBL cellular phenotypes and expression signatures  
399 that are common to the absence of the Xi or Y (rather than sex-divergent), to better understand  
400 the consequences of this compound haploinsufficiency. We also rigorously validated the BAP  
401 model by comparing expression of markers identified across a range of independent early human  
402 and primate embryonic studies (58–61, 96), to find TE and STB markers to be the predominantly  
403 expressed lineage-associated gene sets in our experiments (Fig. S4).

404 Importantly, we find secretion of STB-produced hCG and PlGF is significantly decreased in  
405 45,X cells compared to isogenic euploid controls (Fig. 2B,C). Although differences in STB fusion  
406 index or the fraction of HLA-G<sup>+</sup> cells did not rise to statistical significance (Fig. S3), *PGF* and *HLA-*



407 G transcript levels, respective markers of STB and EVT, were also reduced significantly in 45,X  
408 samples (Fig. 2D). This is relevant because misregulation of HLA-G alone can result in miscarriage  
409 (111), and significantly lower PIGF levels have previously been reported in X-monosomic first  
410 trimester pregnancies (112, 113).

411 Two related insights emerged from the larger pattern of global 45,X-associated expression  
412 changes: 1.) Among significantly enriched gene sets undergoing concordant changes in male -and  
413 female-derived 45,X samples (Fig. 4), we find increased proliferation-associated terms (primary  
414 cilium, DNA replication, splicing, translation) and decreased terms related to maturing STB and  
415 EVT cellular functions (transmembrane transport, immune-regulation, and metabolism), which  
416 included lysosomal processes like autophagy. 2.) Likewise, standard correlation and WGCNA  
417 reveals cell cycle and CTB markers correlate with genes that increase in 45,X samples, whereas  
418 STB and EVT markers correlate and cluster with genes that decrease in 45,X relative to euploid  
419 TBL cells (Fig 5). Because both STB and EVT cells derive from CTB, but must exit the cell cycle upon  
420 fusion or maturation, the correlation between monosomy X and cell cycle / CTB markers (Fig.  
421 5A,B, S7D) suggests 45,X TBL cells are still skewing towards actively cycling CTB at the end of the  
422 8-day BAP differentiation, which may explain their lower secretion of hCG and PIGF (Fig. 2).

423 While the molecular basis of this delay in committing to STB or EVT cell fates remains unclear,  
424 our WGCNA indicates that PAR genes in general, and *ZBED1* specifically, are strongly positively  
425 correlated and well connected inside the turquoise placental gene module (Fig. 5D, S7C,D). This  
426 module was also the top preserved gene module in RNA-seq studies of term placenta and  
427 especially first trimester CVS (Fig. 5C), which are likewise heterogenous in respective CTB vs. STB  
428 and EVT contributions due to sampling. Intriguingly, *ZBED1* does regulate proliferation (114) and  
429 is expressed in human placenta, with higher levels in post-mitotic STB expression than CTB (115).

430 Our study highlights promising areas for follow-up in future *in vitro* work and study of primary  
431 samples. For example, it is unclear whether higher expression of primary cilia components merely  
432 reflects the higher frequency of ciliary re-synthesis in cycling 45,X cells, or altered function of this  
433 important signaling organelle. While mouse trophoblasts lack cilia, human trophoblast carry cilia  
434 (82, 83), and cilia regulate autophagy and NRF2 (86, 116). Curiously, lysosomal genes were widely  
435 down-regulated in 45,X BAP samples (Fig. 4), and impaired autophagy has previously been



436 implicated in recurrent miscarriage (92–94, 117). Whether placental autophagy is de-regulated  
437 in miscarried 45,X conceptuses specifically, and whether cell fate proportions are altered in such  
438 45,X-associated CVS or placental samples, would therefore be of particular interest towards  
439 understanding why human monosomy X terminates early.

440  
441  
442  
443  
444  
445  
446  
447  
448  
449  
450  
451  
452  
453  
454  
455  
456  
457  
458  
459  
460  
461  
462  
463  
464  
465  
466  
467  
468  
469  
470  
471  
472  
473  
474  
475  
476  
477

478 **FIGURE LEGENDS**

479

480 **Figure 1: A.)** Schematic of reprogramming and hiPSC characterization. **B.)** Cytogenetic  
481 characterization (CytoSNP-850k, Illumina) of hiPSC clones used in this study. **C.)** *XIST* expression  
482 by RT-qPCR as a percentage of *GAPDH* (Mann-Whitney-U test p-values). **D.)** *XIST* FISH (left) and  
483 H3K27me3 immunofluorescence (IF, right) images of three 46,XX hiPSC lines. **E.)** Quantification  
484 of *XIST*<sup>+</sup> (left) and H3K27me3<sup>+</sup> (right) cells. **F.)** X chromosome DNA methylation levels across all  
485 three XX clones at two passages inclusive to all experiments reported herein, as well as XY hiPSC  
486 data from (118). Depicted probes indicate methylated DNA fraction ( $\beta$  value) labeled by  
487 associated transitions (1 through 5) and change in DNA methylation during Xi erosion (from (26)).  
488

489 **Figure 2: A.)** IF images of TBLs stained for hCGb and membrane-marking Na<sup>+</sup>/K<sup>+</sup> ATPase, nuclei  
490 counterstained with Hoechst. **B.)** hCG ELISA results in mIU/mL media per ug of RNA harvested  
491 from the same well. **C.)** PIGF ELISA results in pg/mL per ug of RNA, as in B. Mann-Whitney-U tests  
492 p-values reported in B and C compare 45,X samples to otherwise isogenic euploid controls (as  
493 denoted by brackets). **D.)** TBL RNA-seq vst counts of genes relevant to BAP-induced cell fates,  
494 plotted by line. **E.)** Principal component analysis (PCA) of 45,X and otherwise isogenic euploid  
495 control TBL RNA-seq data. Respective symbols and colors indicate karyotype and cell line. **F.)** TBL  
496 RNA-seq vst counts of X-linked non-coding RNA genes relevant to XCI by cell line.  
497

498 **Figure 3: A.)** Median-vst normalized expression values for PAR, Pair (X-linked X/Y pair gene) and  
499 X-specific escapee genes (as identified in Fig. S5). Heatmap columns denote lines, with XX6  
500 expression values highlighted (black bordered box). Three left-most barplot panels report lesser  
501 allele fraction (LAF) as determined by phased RNA-seq. Three centered barplot panels report the  
502 estimated log<sub>2</sub>-scaled fold-change in expression (Log<sub>2</sub>FC) comparing 45,X samples to isogenic  
503 euploid controls (XX19/23 or XX6 for female-donor derived lines, or XY for male-derived lines).  
504 **B.)** Distribution of DNA methylation ( $\beta$ ) values across X (top) and autosomes (bottom) in XX23,  
505 XX19 and XX6 lines, relative to published male control hiPSCs (118). Differences in median tested  
506 for significance by Mann-Whitney U test, with p-values listed above or below brackets. **C.) Left:**  
507 Chromosomal distribution of: differentially methylated probes (DMP) comparing XX6 to isogenic  
508 euploid XX19 and XX23 lines (red), DMPs previously identified in the first transition of Xi erosion  
509 (blue), and all probes on the MethylationEPIC array (black). **Right:** Kolmogorov–Smirnov (KS) test  
510 p-value and distance comparing XX6 DMP density across X to background distribution of all X-  
511 linked probes on the array, and Xi erosion transition-specific DMPs identified in (26). **D.) Left:**  
512 Difference in DMP  $\beta$ -value comparing XX19/23 to XX6 hiPSCs. Dashed line indicates the median  
513 change ( $\beta +0.15$ ). **Right:** Fraction of DMPs with significantly greater (“up”) or lower (“dn”)  $\beta$ -value  
514 in XX6 relative to XX19/23 hiPSCs on X and autosomes. **E.)** Autosomal-median vst normalized  
515 expression of X-linked genes subject to XCI (‘Silenced’), relative to autosomal, X-specific  
516 escapees, PAR and X-linked PAIR genes, across all five conditions. Mann-Whitney U test p-value  
517 indicates significant difference from female-derived 45,X (“Xa1\_fem\_X”) samples. **F.)** Gene-  
518 length normalized expression (FPKM) comparing each class of genes in E.) to each other within  
519 each condition (see text). X:Autosome ratio for each class of genes denoted next to each boxplot.  
520

521 **Figure 4: A.)** Sample-level median-vst normalized expression (“vst diff.”) of all differentially  
522 expressed genes (DEGs, DESeq2  $p_{\text{adj}} \leq 0.05$ ,  $\text{abs}(\log_2\text{FC}) \geq 0.3$ ) in 45,X lines relative to their  
523 isogenic euploid controls (“fXO”, mXO”), and between female-derived 45,X and male 46,XY  
524 replicates (“XY-fXO”). Number of overlapping and concordant DEGs identified in all three (top) or  
525 any two comparisons listed as a fraction alongside calculated p-value (sign test), left of barplot  
526 panels that report the DESeq2 Wald statistic. DEGs concordant across comparisons annotated in  
527 dark grey, discordant DEGs in light grey, in the heatmap-adjacent column. **B.)** Gene-set  
528 enrichment analysis (GSEA) against the Wikipathway collection (via MsigDB) for each comparison  
529 (“fXO”, “mXO”, “XY-fXO”), as well as a gene list re-ranked by the average Wald statistic from all  
530 three quantile-normalized sets (“aveXO”), and control comparison between male- and female-  
531 derived 45,X samples (“XOXO”). Bubble position, color and size, denote the signed log<sub>10</sub>-scaled  
532 GSEA  $p_{\text{adjust}}$ , the normalized enrichment score, and the number of core genes driving the  
533 enrichment, respectively, and are plotted opposite of abbreviated Wikipathway titles. **C.)**  
534 Semantic similarity-driven clusters and aggregated titles of biological process (BP) terms of the  
535 gene ontology (GO) enriched in GSEA (“aveXO”). Node colors and sizes denote signed log<sub>10</sub>-  
536 scaled GSEA  $p_{\text{adjust}}$  value and number of corresponding genes, respectively. **D.)** GSEA-enriched  
537 GO terms (beige) relevant to cilia, lysosomes, or autophagy and corresponding genes colored by  
538 “fXO” Wald statistic (red or blue for up- or downregulated DEGs in 45,X samples, grey for non-  
539 DEGs). **E.)** as in D.) for “mXO” Wald score-based GSEA terms.

540  
541 **Figure 5: A.)** Significant ( $p \leq 0.05$ ) expression correlation coefficients ( $\rho$ ) between different  
542 escapee gene classes (All, PAR, X/Y-pair gene, and escapees lacking a Y homolog), and secreted  
543 PIGF and hCG levels, as well as cycling (119) and cell type markers from early human embryonic  
544 studies (58, 60, 61, 96), suffixed by first-author’s last initial (.W, .X, .Z, .C). Cell fates abbreviated  
545 for cyto-TB (CTB), early amnion (E-AM), epiblast (EPI), extravillous TB (EVT), mixed (MIX),  
546 primordial endoderm (PE) and syncytio-TB (STB). **B.)** Signed network from WGCNA plotted over  
547 module assignments, DESeq2 Wald stats (fXO, mXO, XY-fXO, and aveXO; up in red, down in blue),  
548 and Pearson correlation ( $r$ ) with PIGF and hCG levels, as well as with median-normalized marker  
549 sets labeled as a in (A). **C.)** Permutation-based Z summary statistic for preservation of modules  
550 from B.) in another BAP dataset (99), (sex-stratified) first trimester chorionic villi sampling (CVS)  
551 (69), and two studies of term placenta (100, 101), the latter of which was further stratified by  
552 sex, birthweight or randomized (“rand”) to control datasets of similar size. **D.)** kME correlation  
553 coefficient of each escapee gene with its assigned module eigengene (heatmap), and enrichment  
554 analysis (log<sub>10</sub>-scaled p-value, Fisher test) for module assignment of various escapee gene  
555 classes. Region (PAR vs. NPX) and reported XCI status annotated on the left as in Fig. S5A.

556  
557  
558  
559  
560  
561  
562  
563  
564

## 565 MATERIALS AND METHODS

### 566 *Reprogramming and iPSC culture*

567 Fibroblasts were reprogrammed into hiPSCs at the UConn Stem Cell Core, using the CytoTune  
568 iPSC 2.0 Sendai Reprogramming kit (Thermo Fisher Scientific, Waltham, MA). All hiPSC clones  
569 were initially cultured on mitotically inactive mouse embryonic fibroblasts (MEFs) in standard  
570 human iPSC media (80% DMEM/F12, 20% Knockout Serum Replacement, 1% Glutamax, 1% Non-  
571 Essential Amino Acids, 0.1%  $\beta$ -Mercaptoethanol, and 8ng/mL FGF), and maintained by weekly  
572 mechanical passaging. Subsequently, hiPSCs were transitioned to mTESR media (Stem Cell  
573 Technologies, Cambridge, MA), grown on extracellular matrix (Geltrex, Thermo Fisher, Waltham,  
574 MA), and passaged weekly with EDTA.

### 575 *Cytogenetic analysis and DNA methylation profiling*

576 Karyotype analysis was performed on 20 GTG banded metaphase cells at the UConn  
577 Center for Genome Innovation. Cytogenomic analysis was performed at the UConn Center for  
578 Genome Innovation on the CytoSNP-850k v1.2 (Illumina) platform, using phenol-chloroform  
579 extracted genomic DNA.

580 For DNA methylation analysis, genomic DNA from euploid 46,XX cells was bisulfite-  
581 converted using the EZ DNA Methylation Kit (Zymo Research, Irvine, CA), labeled and hybridized  
582 using the Infinium Methylation EPIC BeadChip Kit (Illumina, San Diego, CA) following standard  
583 protocol of each manufacturer, and scanned on a NextSeq 550 system. The data were analyzed  
584 using the minfi R package with IlluminaNormalization (120). Probes with a UCSC\_RefGene\_Group  
585 designation of TSS1500, TSS200, or 5\_UTR were designated as promoter probes. Differentially  
586 methylated probes (DMPs) characterized previously (26) and associated with specific transitions  
587 during Xi erosion were queried (in Fig. 1F). New DMPs distinguishing XX6 from XX19/23 were  
588 called via minfi ( $p$ -value  $\leq 0.05$ ). KS distances and KS test significance were calculated comparing  
589 the gaussian probe densities across the X chromosome for each probe set (all X-linked Infinium  
590 MethylePIC probes, and transitions 1-5 from (26)). Change in DNA methylation ( $\beta$  value) was  
591 calculated as the difference between the mean XX6 probe  $\beta$  and the mean XX19/23 probe  
592  $\beta$  value.

### 593 *DNA sequencing and phasing*

594 High molecular weight (HMW) genomic DNA was prepared following cell lysis in 10%  
595 sarcosyl/5uM NaCl/100uM EDTA/100uM Tris pH 8 with 1mg/mL Proteinase-K, and incubation at  
596 55°C overnight. After RNA digestion (20ug/mL RNase-A) for 30 minutes at 37°C, HMW genomic  
597 DNA was isolated by phenol chloroform extraction in Phase-Lock Gel Heavy tubes (Quantabio,  
598 Beverly, MA), and precipitated in 70% ethanol, washed in 70% ethanol, and re-solubilized in 10  
599 mM Tris pH8, 0.1 mM EDTA (Te). The HMW-gDNA was sequenced to  $\sim 30x$  coverage, following  
600 library preparation on the 10X Genomics Linked-Read platform at the UConn Center for Genome  
601 Innovation. LongRanger (10X Genomics) was used for read alignment and phasing of variants  
602 genome-wide. X-linked phased variants were supplied alongside RNA-seq data to obtain A and B  
603 allele counts for X chromosome genes using phASER (121).

### 604 *RT-qPCR*

605 Reverse transcription was performed using the iScript gDNA Clear cDNA Synthesis Kit (Bio-  
606 Rad, Hercules, CA). Quantitative PCR was performed on the resulting cDNA using the iTaq

607 Universal SYBR Green Supermix (Bio-Rad, Hercules, CA) with the primers XIST\_F:  
608 CTCCAGATAGCTGGCAACC; XIST\_R: AGCTCCTCGGACAGCTGTAA; GAPDH\_F:  
609 CTGGGGCTGGCATTGCCCTC; GAPDH\_R: GGCAGGGACTCCCCAGCAGT.

#### 610 *Trophoblast Differentiation*

611 TBLs were differentiated from hiPSC as described (18) with minor modifications. Briefly,  
612 confluent hiPSC clones cultured in mTeSR were dissociated with Accutase and plated at 50,000  
613 cells/well of a 6well plate in mTeSR with 10uM Y-27632 (Tocris Bioscience, Bristol, UK) for one  
614 day. Then media was changed to mouse embryonic fibroblast conditioned media (MEF-CM),  
615 supplemented with 8ng/uL human basic FGF (Thermo Fisher Scientific) and 10uM Y-27632. The  
616 following day, media was switched to BAP differentiation media, which consisted of MEF-CM  
617 with 10ng/mL BMP4 (Peprotech, Rocky Hill, NJ), 1uM A83-01 (Stem Cell Technologies) and 0.1uM  
618 PD173074 (Stem Cell Technologies). Media was changed daily until day 8 when cells and  
619 supernatant were harvested for RNA collection, IF, or ELISA, respectively. For ELISA, supernatants  
620 were diluted 1:1,000 for the hCG ELISA (GenWay Biotech, San Diego, CA) and 1:50 for the PIGF  
621 ELISA (R&D Systems, Minneapolis, MN).

#### 622 *Immunocytochemistry*

623 Immunocytochemistry was performed on the hiPSCs using the PSC-4 Marker  
624 Immunocytochemistry Kit (Thermo Fisher Scientific, A24881). For immunocytochemistry of  
625 trophoblast markers after eight days of BAP differentiation, cells were fixed in 4% PFA for 30  
626 minutes at 4°C, washed with 0.1% Triton-X, permeabilized with 0.5% Triton-X for 5 minutes.  
627 Following blocking in 5% normal goat serum/2% BSA/0.1% Tween-20, cells were incubated  
628 overnight at 4°C with rabbit monoclonal ATPase antibody (Abcam, ab76020, 1:500), mouse  
629 monoclonal HLA-G antibody (Abcam, ab52455, 1:500) or mouse hCGb antibody (ThermoFisher,  
630 MA-35020, 1:100). Slides were then washed twice in 0.1% Tween-20, incubated with AlexaFluor-  
631 555 Goat-anti-Mouse and AlexaFluor-647 Goat-anti-Rabbit Secondary Antibodies (Thermo Fisher  
632 Scientific, Waltham, MA, both at 1:500) for 1 hour at room temperature. Cells were washed twice  
633 in 0.1% Tween-20, stained with Hoechst-33342, and mounted with ProLong Gold Mounting  
634 Medium. Fluorescent images were taken on an EVOS Auto FL Cell Imaging System (Thermo Fisher  
635 Scientific, Waltham, MA).

#### 636 *Fusion Index*

637 The fusion index was calculated by automated analysis of Hoechst-stained images using  
638 CellProfiler (122). Nuclei were identified as objects, and recorded by their integrated intensity  
639 and size, using hiPSCs to provide an empirical null distribution representing unfused cells. Using  
640 the 99<sup>th</sup> percentile of the null distribution as an integrated intensity cutoff, TBL nuclei with greater  
641 or equal to 99<sup>th</sup> percentile intensity were designated as fused. This threshold was additionally  
642 normalized by the difference in median intensity to account for differences in staining or  
643 illumination. The fusion index was calculated by dividing the integrated intensities of all fused  
644 objects by the total integrated intensity.

#### 645 *Transwell Migration Assay*

646 The trophoblast differentiation was performed in Corning BioCoat Matrigel Invasion  
647 Chambers (Corning, NY) with 8 µm pores. 50,000 iPSCs were plated on the top of each chamber  
648 and differentiated, fixed and stained as described above. The migration index was calculated by

649 dividing the total DNA integrated intensity of the bottom by the sum of integrated intensity on  
650 the top and bottom of the transwell.

### 651 *RNA Sequencing*

652 RNA was extracted from iPSCs using the PureLink RNA Mini Kit (Thermo Fisher Scientific,  
653 Waltham, MA). For 3'mRNA-seq, libraries were prepared using the Quant-seq 3' mRNA Library  
654 Prep Kit FWD (Lexogen, Greenland, NH) and single-end 75bp reads were sequenced on the  
655 NextSeq 500 (Illumina, San Diego, CA). Genes queried for hiPSC identity were listed on the  
656 TaqMan hPSC Scorecard Assay (Thermo Fisher Scientific, Waltham, MA). For standard mRNA-seq,  
657 libraries were prepared at the UConn Center for Genome Innovation using the Illumina Strand  
658 mRNA Kit and 100bp paired-ends reads were sequenced to an average depth of 40 million  
659 reads/replicate on the NovaSeq (Illumina, San Diego, CA).

### 660 *Allelic RNA-seq, differential expression, GSEA and WGCNA*

661 Read pairs were trimmed using cutadapt v2.7 (123), aligned to the human genome (hg38)  
662 with hisat v2.2.1 (124), and quantified against GENCODE version 36 (125), with featureCounts  
663 v2.0 from the Rsubread package (126). For escapee calls based on phased linked read variants  
664 from linked-read sequencing, A and B allele counts from phaser (121) were tabulated by cell line  
665 across replicates, and 46,XX allelic counts were adjusted for each gene based on the absent allele  
666 count in 45,X replicates and relative total allelic read depth in 45,X and 46,XX replicates. Escapee  
667 calls were made using a binomial test (lesser allele fraction,  $LAF > 0.1$ ,  $p \leq 0.05$ ) for all X-linked  
668 genes with a minimal allelic read count to identify escapees with  $LAF \geq 0.2$  (power of 0.9, given a  
669 read error rate of 0.01).

670 For differential expression using DESeq2 (127), count tables were filtered for genes with  
671 sufficient expression (10 count average, with 20 counts in at least 2 samples). Surrogate variables  
672 were estimated using the sva package (128), and added to the DESeq2 design, which compared  
673 conditions based on Xa identity (female-derived: Xa1, Xa2, male-derived: Xa3) and monosomy X  
674 (45,X vs. 46,XX or 46,XY). Gene-set enrichment analysis (GSEA) using clusterProfiler (129) was  
675 performed on all genes ranked by DESeq2's Wald statistic in three separate conditions, as well as  
676 the average of their quantile-normalized Wald scores to ensure equal weighting. GSEA terms  
677 were abbreviated and plotted using clusterProfiler, across a range of p.adj thresholds (all  $\leq 0.1$  in  
678 the aveXO GSEA) to accommodate plot size limitations. Weighted gene co-expression network  
679 analysis (WGCNA) was performed on vst counts for all genes with Entrez geneid (130), using the  
680 WGCNA package (95), as a signed hybrid network using the biweight midcorrelation raised to a  
681 soft thresholding power of 16 (scale-free topology fit  $\geq 0.85$ ). Modules were correlated to  
682 normalized hCG and PIGF ELISA values, and to averaged early embryonic lineage marker sets,  
683 which were median vst normalized to ensure equal weights across all sets. Module preservation  
684 analysis was performed with the WGCNA package against published BAP (99), CVS (69) and term  
685 placenta (100, 101) RNA-seq datasets. Enrichment analysis of escapee gene class across WGCNA  
686 modules applied a hypergeometric test ( $p \leq 0.05$ ). Enrichment analysis of gene sets across  
687 WGCNA modules was performed using the compareCluster function of the clusterProfiler  
688 package (129).

689

690

691



692 **ACKNOWLEDGMENTS**

693 We would like acknowledge Yaling Liu and Leann Crandall at UConn Health's Cell and  
694 Genome Engineering Core for hiPSC reprogramming and immunocytochemistry services. We  
695 would also like to thank Lisa LaBelle and Judy Brown at the UConn Chromosome Core for  
696 cytogenetic characterization of our hiPSC lines services, and Bo Reese at the UConn Center for  
697 Genome Innovation for mRNA-seq library preparation and sequencing. This work was supported  
698 by NIH grant R35GM124926 to S.F.P.

699

700 **REFERENCES**

701

- 702 1. A.-V. Gendrel, E. Heard, Noncoding RNAs and Epigenetic Mechanisms During X-  
703 Chromosome Inactivation. *Annu. Rev. Cell Dev. Biol.*, 1–20 (2014).
- 704 2. J. F. Hughes, D. C. Page, The Biology and Evolution of Mammalian Y Chromosomes. *Annu.*  
705 *Rev. Genet.* **49**, 507–527 (2015).
- 706 3. D. W. Bellott, *et al.*, Mammalian Y chromosomes retain widely expressed dosage-  
707 sensitive regulators. *Nature* **508**, 494–9 (2014).
- 708 4. A. K. San Roman, D. C. Page, A strategic research alliance: Turner syndrome and sex  
709 differences. *Am. J. Med. Genet. Part C Semin. Med. Genet.* **181**, 92–100 (2019).
- 710 5. T. Raudsepp, B. P. Chowdhary, The Eutherian Pseudoautosomal Region. *Cytogenet.*  
711 *Genome Res.* (2016) <https://doi.org/10.1159/000443157> (February 4, 2016).
- 712 6. J. Perry, S. Palmer, A. Gabriel, A. Ashworth, A short pseudoautosomal region in  
713 laboratory mice. *Genome Res.* **11**, 1826–32 (2001).
- 714 7. B. P. Balaton, O. Fornes, W. W. Wasserman, C. J. Brown, Cross-species examination of X-  
715 chromosome inactivation highlights domains of escape from silencing. *Epigenetics and*  
716 *Chromatin* **14**, 12 (2021).
- 717 8. P. M. Y. Lynn, W. Davies, The 39,XO mouse as a model for the neurobiology of Turner  
718 syndrome and sex-biased neuropsychiatric disorders. *Behav. Brain Res.* **179**, 173–182  
719 (2007).
- 720 9. F. J. Probst, M. L. Cooper, S. W. Cheung, M. J. Justice, Genotype, phenotype, and  
721 karyotype correlation in the XO mouse model of turner syndrome. *J. Hered.* **99**, 512–517  
722 (2008).
- 723 10. L. L. Levitsky, A. H. O. Luria, F. J. Hayes, A. E. Lin, Turner syndrome: update on biology and  
724 management across the life span. *Curr. Opin. Endocrinol. Diabetes. Obes.* **22**, 65–72  
725 (2015).
- 726 11. C. H. Gravholt, M. H. Viuff, S. Brun, K. Stochholm, N. H. Andersen, Turner syndrome:  
727 mechanisms and management. *Nat. Rev. Endocrinol.* **15**, 601–614 (2019).
- 728 12. N. Canki, D. Warburton, J. Byrne, Morphological characteristics of monosomy X in  
729 spontaneous abortions. *Ann. génétique* **31**, 4–13 (1988).
- 730 13. E. B. Hook, Exclusion of chromosomal mosaicism: tables of 90%, 95%, and 99%  
731 confidence limits and comments on use. *Am. J. Hum. Genet.* **29**, 94–97 (1977).
- 732 14. E. B. Hook, D. Warburton, The distribution of chromosomal genotypes associated with  
733 Turner's syndrome: livebirth prevalence rates and evidence for diminished fetal mortality  
734 and severity in genotypes associated with structural X abnormalities or mosaicism. *Hum.*  
735 *Genet.* **64**, 24–7 (1983).



- 736 15. E. B. Hook, D. Warburton, Turner syndrome revisited: review of new data supports the  
737 hypothesis that all viable 45,X cases are cryptic mosaics with a rescue cell line, implying  
738 an origin by mitotic loss. *Hum. Genet.* **133**, 417–24 (2014).
- 739 16. A. Urbach, N. Benvenisty, Studying early lethality of 45,XO (Turner’s syndrome) embryos  
740 using human embryonic stem cells. *PLoS One* **4**, e4175 (2009).
- 741 17. W. Li, *et al.*, Modeling abnormal early development with induced pluripotent stem cells  
742 from aneuploid syndromes. *Hum. Mol. Genet.* **21**, 32–45 (2012).
- 743 18. S. Yabe, *et al.*, Comparison of syncytiotrophoblast generated from human embryonic  
744 stem cells and from term placentas. *Proc. Natl. Acad. Sci. U. S. A.*, 1601630113- (2016).
- 745 19. R. M. Roberts, T. Ezashi, M. A. Sheridan, Y. Yang, Specification of trophoblast from  
746 embryonic stem cells exposed to BMP4. *Biol. Reprod.* **99**, 212–224 (2018).
- 747 20. C. Krendl, *et al.*, GATA2/3-TFAP2A/C transcription factor network couples human  
748 pluripotent stem cell differentiation to trophectoderm with repression of pluripotency.  
749 *Proc. Natl. Acad. Sci. U. S. A.* **114**, E9579–E9588 (2017).
- 750 21. M. J. MacHiela, *et al.*, Female chromosome X mosaicism is age-related and preferentially  
751 affects the inactivated X chromosome. *Nat. Commun.* **7**, 1–9 (2016).
- 752 22. D. J. Wright, *et al.*, Genetic variants associated with mosaic Y chromosome loss highlight  
753 cell cycle genes and overlap with cancer susceptibility. *Nat. Genet.* **49**, 674–679 (2017).
- 754 23. M. Miyado, M. Fukami, Losing maleness: Somatic Y chromosome loss at every stage of a  
755 man’s life. *FASEB BioAdvances* **1**, 350–352 (2019).
- 756 24. K. L. L. Nazer, *et al.*, Recurrent Variations in DNA Methylation in Human Pluripotent Stem  
757 Cells and Their Differentiated Derivatives. *Cell Stem Cell* **10**, 620–634 (2012).
- 758 25. S. Mekhoubad, *et al.*, Erosion of Dosage Compensation Impacts Human iPSC Disease  
759 Modeling. *Cell Stem Cell* **10**, 595–609 (2012).
- 760 26. P. Bansal, D. T. Ahern, Y. Kondaveeti, C. W. Qiu, S. F. Pinter, Contiguous erosion of the  
761 inactive X in human pluripotency concludes with global DNA hypomethylation. *Cell Rep.*  
762 **35**, 109215 (2021).
- 763 27. A. Feki, S.-B. Frédérique, Y. Hibaoui, Parallel derivation of X-monosomy induced  
764 pluripotent stem cells (iPSCs) with isogenic control iPSCs. *Stem Cell Res.* **47**, 101920  
765 (2020).
- 766 28. Y. Luo, *et al.*, Uniparental disomy of the entire X chromosome in Turner syndrome  
767 patient-specific induced pluripotent stem cells. *Cell Discov.* **1**, 15022 (2015).
- 768 29. J.-C. Biancotti, *et al.*, Human Embryonic Stem Cells as Models for Aneuploid  
769 Chromosomal Syndromes. *Stem Cells* **28**, 1530–1540 (2010).
- 770 30. J. Zhou, *et al.*, Modeling human peri-implantation placental development and function†.  
771 *Biol. Reprod.* (2021) <https://doi.org/10.1093/biolre/ioab080> (June 15, 2021).
- 772 31. C. Dong, *et al.*, Derivation of trophoblast stem cells from naïve human pluripotent stem  
773 cells. *Elife* **9** (2020).
- 774 32. J. K. Cinkornpumin, *et al.*, Naive Human Embryonic Stem Cells Can Give Rise to Cells with  
775 a Trophoblast-like Transcriptome and Methylome. *Stem Cell Reports* **15**, 198–213 (2020).
- 776 33. M. Amita, *et al.*, Complete and unidirectional conversion of human embryonic stem cells  
777 to trophoblast by BMP4. *Proc. Natl. Acad. Sci. U. S. A.* **110** (2013).
- 778 34. M. Horii, *et al.*, Human pluripotent stem cells as a model of trophoblast differentiation in  
779 both normal development and disease. *Proc. Natl. Acad. Sci. U. S. A.* **113**, E3882–E3891

- 780 (2016).
- 781 35. X. Gao, *et al.*, Establishment of porcine and human expanded potential stem cells. *Nat.*  
782 *Cell Biol.* **21**, 687–699 (2019).
- 783 36. G. Castel, *et al.*, Induction of Human Trophoblast Stem Cells from Somatic Cells and  
784 Pluripotent Stem Cells. *Cell Rep.* **33** (2020).
- 785 37. S. Kilens, *et al.*, Parallel derivation of isogenic human primed and naive induced  
786 pluripotent stem cells. *Nat. Commun.* **9**, 360 (2018).
- 787 38. B. Di Stefano, *et al.*, Reduced MEK inhibition preserves genomic stability in naive human  
788 embryonic stem cells. *Nat. Methods* **15**, 732–740 (2018).
- 789 39. T. W. Theunissen, *et al.*, Molecular Criteria for Defining the Naive Human Pluripotent  
790 State. *Cell Stem Cell* **19**, 502–515 (2016).
- 791 40. G. Guo, *et al.*, Epigenetic resetting of human pluripotency. *Development* **144**, 2748–2763  
792 (2017).
- 793 41. W. A. Pastor, *et al.*, Naive Human Pluripotent Cells Feature a Methylation Landscape  
794 Devoid of Blastocyst or Germline Memory. *Cell Stem Cell* **18**, 323–329 (2016).
- 795 42. X. Wang, D. C. Miller, R. Harman, D. F. Antczak, A. G. Clark, Paternally expressed genes  
796 predominate in the placenta. *Proc. Natl. Acad. Sci. U. S. A.* **110**, 10705–10 (2013).
- 797 43. D. Monk, Genomic imprinting in the human placenta. *Am. J. Obstet. Gynecol.* **213**, S152–  
798 S162 (2015).
- 799 44. I. Sagi, *et al.*, Distinct Imprinting Signatures and Biased Differentiation of Human  
800 Androgenetic and Parthenogenetic Embryonic Stem Cells. *Cell Stem Cell* **25**, 419–432.e9  
801 (2019).
- 802 45. C. W. Hanna, Placental imprinting: Emerging mechanisms and functions. *PLOS Genet.* **16**,  
803 e1008709 (2020).
- 804 46. C. M. Syrett, I. Sierra, C. L. Berry, D. Beiting, M. C. Anguera, Sex-Specific Gene Expression  
805 Differences Are Evident in Human Embryonic Stem Cells and During In Vitro  
806 Differentiation of Human Placental Progenitor Cells. *Stem Cells Dev.* **27**, 1360–1375  
807 (2018).
- 808 47. L. Xiao, *et al.*, Deciphering a distinct regulatory network of TEAD4, CDX2 and GATA3 in  
809 humans for trophoblast transition from embryonic stem cells. *Biochim. Biophys. Acta -*  
810 *Mol. Cell Res.* **1867**, 118736 (2020).
- 811 48. R. M. Karvas, *et al.*, Use of a human embryonic stem cell model to discover GABRP,  
812 WFDC2, VTCN1 and ACTC1 as markers of early first trimester human trophoblast. *Mol.*  
813 *Hum. Reprod.* **26**, 425–440 (2020).
- 814 49. A. Jain, T. Ezashi, R. M. Roberts, G. Tuteja, Deciphering transcriptional regulation in  
815 human embryonic stem cells specified towards a trophoblast fate. *Sci. Rep.* **7**, 1–12  
816 (2017).
- 817 50. M. Hemberger, C. W. Hanna, W. Dean, Mechanisms of early placental development in  
818 mouse and humans. *Nat. Rev. Genet.* **21**, 27–43 (2020).
- 819 51. A. Malassiné, L. Cronier, Hormones and human trophoblast differentiation: A review.  
820 *Endocrine* **19**, 3–11 (2002).
- 821 52. S. Srisuparp, Z. Strakova, A. T. Fazleabas, The Role of Chorionic Gonadotropin (CG) in  
822 Blastocyst Implantation. *Arch. Med. Res.* **32**, 627–634 (2001).
- 823 53. M. Barjaktarovic, *et al.*, Human chorionic gonadotropin (hCG) concentrations during the

- 824 late first trimester are associated with fetal growth in a fetal sex-specific manner. *Eur. J.*  
825 *Epidemiol.* **32**.
- 826 54. A. P. Londero, *et al.*, Placental hCG immunohistochemistry and serum free-Beta-hCG at  
827 11-13 weeks' gestation in intrauterine fetal demise [https://doi.org/10.1007/s00418-012-](https://doi.org/10.1007/s00418-012-1054-9)  
828 1054-9.
- 829 55. A. Athanassiades, P. K. Lala, Role of placenta growth factor (PlGF) in human extravillous  
830 trophoblast proliferation, migration and invasiveness. *Placenta* **19**, 465–473 (1998).
- 831 56. J. F. Silva, R. Serakides, Cell Adhesion & Migration Intrauterine trophoblast  
832 migration: A comparative view of humans and rodents (2016)  
833 <https://doi.org/10.1080/19336918.2015.1120397>.
- 834 57. B. P. Telugu, *et al.*, Comparison of extravillous trophoblast cells derived from human  
835 embryonic stem cells and from first trimester human placentas NIH Public Access.  
836 *Placenta* **34**, 536–543 (2013).
- 837 58. F. Zhou, *et al.*, Reconstituting the transcriptome and DNA methylome landscapes of  
838 human implantation. *Nature* **572**, 660–664 (2019).
- 839 59. L. Xiang, *et al.*, A developmental landscape of 3D-cultured human pre-gastrulation  
840 embryos. *Nature* **577**, 537–542 (2020).
- 841 60. H. Ma, *et al.*, In vitro culture of cynomolgus monkey embryos beyond early gastrulation.  
842 *Science (80-. )*. **366** (2019).
- 843 61. S. Chhabra, A. Warmflash, BMP-treated human embryonic stem cells transcriptionally  
844 resemble amnion cells in the monkey embryo. *Biol. Open* **10** (2021).
- 845 62. G. Guo, *et al.*, Human naive epiblast cells possess unrestricted lineage potential. *Cell*  
846 *Stem Cell* **28**, 1040-1056.e6 (2021).
- 847 63. S. Io, *et al.*, Capturing human trophoblast development with naive pluripotent stem cells  
848 in vitro. *Cell Stem Cell* **28**, 1023-1039.e13 (2021).
- 849 64. M. Ohgushi, M. Eiraku, Cell-autonomous differentiation of human primed embryonic  
850 stem cells into trophoblastic syncytia through the nascent amnion-like cell state. *bioRxiv*,  
851 2021.06.28.450118 (2021).
- 852 65. T. Tukiainen, *et al.*, Landscape of X chromosome inactivation across human tissues.  
853 *Nature* **550**, 244–248 (2017).
- 854 66. S. Gong, *et al.*, Placental polyamine metabolism differs by fetal sex, fetal growth  
855 restriction, and preeclampsia. *JCI insight* **3** (2018).
- 856 67. T. N. Phung, K. C. Olney, H. J. Kliman, M. A. Wilson, Patchy, incomplete, and  
857 heterogeneous X-inactivation in the human placenta. *bioRxiv*, 785105 (2019).
- 858 68. L. Ding, S. Li, Y. Zhang, J. Gai, J. Kou, MXRA5 is decreased in preeclampsia and affects  
859 trophoblast cell invasion through the MAPK pathway. *Mol. Cell. Endocrinol.* **461**, 248–255  
860 (2018).
- 861 69. T. L. Gonzalez, *et al.*, Sex differences in the late first trimester human placenta  
862 transcriptome. *Biol. Sex Differ.* **9** (2018).
- 863 70. S. Buckberry, T. Bianco-Miotto, C. T. Roberts, Imprinted and X-linked non-coding RNAs as  
864 potential regulators of human placental function. *Epigenetics* **9**, 81–9 (2014).
- 865 71. W. Chatuphonprasert, K. Jarukamjorn, I. Ellinger, Physiology and pathophysiology of  
866 steroid biosynthesis, transport and metabolism in the human placenta. *Front. Pharmacol.*  
867 **9**, 1027 (2018).

- 868 72. A. Farrell, *et al.*, Faulty oxygen sensing disrupts angiomin function in trophoblast cell  
869 migration and predisposes to preeclampsia. *JCI Insight* **4** (2019).
- 870 73. T. Basak, *et al.*, Sequestration of eIF4A by angiomin: A novel mechanism to restrict  
871 global protein synthesis in trophoblast cells. *Stem Cells* **39**, 210–226 (2021).
- 872 74. C. Gerri, *et al.*, Initiation of a conserved trophoblast program in human, cow and  
873 mouse embryos. *Nature* **587**, 443–447 (2020).
- 874 75. E. Pessia, J. Engelstädter, G. A. B. Marais, The evolution of X chromosome inactivation in  
875 mammals: the demise of Ohno’s hypothesis? *Cell. Mol. Life Sci.* **71**, 1383–1394 (2014).
- 876 76. D. M. Snell, J. M. A. Turner, Sex Chromosome Effects on Male-Female Differences in  
877 Mammals. *Curr. Biol.* **28**, R1313–R1324 (2018).
- 878 77. J. Cao, *et al.*, A human cell atlas of fetal gene expression. *Science (80-. )*. **370** (2020).
- 879 78. N. Kweider, *et al.*, A Role for Nrf2 in Redox Signalling of the Invasive Extravillous  
880 Trophoblast in Severe Early Onset IUGR Associated with Preeclampsia. *PLoS One* **7**  
881 (2012).
- 882 79. M. He, *et al.*, Nrf2 signalling and autophagy are involved in diabetes mellitus-induced  
883 defects in the development of mouse placenta. *Open Biol.* **6**, 160064 (2016).
- 884 80. S. Muralimanoharan, Y. T. Kwak, C. R. Mendelson, Redox-Sensitive Transcription Factor  
885 NRF2 Enhances Trophoblast Differentiation via Induction of miR-1246 and Aromatase.  
886 *Endocrinology* **159**, 2022–2033 (2018).
- 887 81. R. Morey, *et al.*, Transcriptomic Drivers of Differentiation, Maturation, and Polyploidy in  
888 Human Extravillous Trophoblast. *Front. Cell Dev. Biol.* **9**, 2269 (2021).
- 889 82. C. Y. Wang, H. L. Tsai, J. S. Syu, T. Y. Chen, M. T. Su, Primary Cilium-Regulated EG-VEGF  
890 Signaling Facilitates Trophoblast Invasion. *J. Cell. Physiol.* **232**, 1467–1477 (2017).
- 891 83. A. Ritter, *et al.*, Primary Cilia in Trophoblastic Cells. *Hypertension* **76**, 1491–1505 (2020).
- 892 84. J. Jang, *et al.*, Primary Cilium-Autophagy-Nrf2 (PAN) Axis Activation Commits Human  
893 Embryonic Stem Cells to a Neuroectoderm Fate. *Cell* **165**, 410–420 (2016).
- 894 85. P. Liu, M. Dodson, D. Fang, E. Chapman, D. D. Zhang, NRF2 negatively regulates primary  
895 ciliogenesis and hedgehog signaling. *PLOS Biol.* **18**, e3000620 (2020).
- 896 86. A. Martin-Hurtado, I. Lastres-Becker, A. Cuadrado, F. R. Garcia-Gonzalo, NRF2 and  
897 primary cilia: An emerging partnership. *Antioxidants* **9** (2020).
- 898 87. M. G. Kapetanaki, *et al.*, Free heme regulates placenta growth factor through NRF2-  
899 antioxidant response signaling. *Free Radic. Biol. Med.* **143**, 300–308 (2019).
- 900 88. T. E. Sussan, *et al.*, Nrf2 regulates gene-environment interactions in an animal model of  
901 intrauterine inflammation: Implications for preterm birth and prematurity. *Sci. Rep.* **7**, 1–  
902 9 (2017).
- 903 89. N. Kweider, *et al.*, The effects of Nrf2 deletion on placental morphology and exchange  
904 capacity in the mouse. *J. Matern. Neonatal Med.* **30**, 2068–2073 (2017).
- 905 90. M. Nezu, *et al.*, Nrf2 inactivation enhances placental angiogenesis in a preeclampsia  
906 mouse model and improves maternal and fetal outcomes. *Sci. Signal.* **10** (2017).
- 907 91. B. Chifenti, *et al.*, Autophagy-related protein LC3 and Beclin-1 in the first trimester of  
908 pregnancy. *Clin. Exp. Reprod. Med.* **40**, 33–37 (2013).
- 909 92. L. Avagliano, *et al.*, Autophagy in normal and abnormal early human pregnancies.  
910 *Reprod. Sci.* **22**, 838–844 (2015).
- 911 93. H. X. Tan, S. L. Yang, M. Q. Li, H. Y. Wang, Autophagy suppression of trophoblast cells

- 912 induces pregnancy loss by activating decidual NK cytotoxicity and inhibiting trophoblast  
913 invasion. *Cell Commun. Signal.* **18**, 73 (2020).
- 914 94. S. Shah Nawaz, *et al.*, Dysregulated Autophagy Leads to Oxidative Stress and Aberrant  
915 Expression of ABC Transporters in Women with Early Miscarriage. *Antioxidants* **10**, 1742  
916 (2021).
- 917 95. P. Langfelder, S. Horvath, WGCNA: An R package for weighted correlation network  
918 analysis. *BMC Bioinformatics* **9**, 1–13 (2008).
- 919 96. R. C. West, *et al.*, Dynamics of trophoblast differentiation in peri-implantation–stage  
920 human embryos. *Proc. Natl. Acad. Sci. U. S. A.* **116**, 22635–22644 (2019).
- 921 97. Y. Liu, *et al.*, Single-cell RNA-seq reveals the diversity of trophoblast subtypes and  
922 patterns of differentiation in the human placenta. *Cell Res.* **28**, 819–832 (2018).
- 923 98. P. Velicky, *et al.*, Genome amplification and cellular senescence are hallmarks of human  
924 placenta development. *PLoS Genet.* **14**, e1007698 (2018).
- 925 99. M. A. Sheridan, *et al.*, Early onset preeclampsia in a model for human placental  
926 trophoblast. *Proc. Natl. Acad. Sci. U. S. A.* **116**, 4336–4345 (2019).
- 927 100. S. Buckberry, *et al.*, Placental transcriptome co-expression analysis reveals conserved  
928 regulatory programs across gestation. *BMC Genomics* **18**, 1–13 (2017).
- 929 101. M. A. Deyssenroth, *et al.*, Whole-transcriptome analysis delineates the human placenta  
930 gene network and its associations with fetal growth. *BMC Genomics* **18**, 1–14 (2017).
- 931 102. Y. Zhang, J. Cuerdo, M. K. Halushka, M. N. Mccall, The effect of tissue composition on  
932 gene co-expression. *Brief. Bioinform.* **22**, 127–139 (2021).
- 933 103. L. Wang, Z. C. Wang, C. Xie, X. F. Liu, M. S. Yang, Genome-wide screening for risk loci of  
934 idiopathic recurrent miscarriage in a Han Chinese population: A pilot study. *Reprod. Sci.*  
935 **17**, 578–584 (2010).
- 936 104. N. Perez, S. Ostojic, M. Kapovic, B. Peterlin, Systematic review and meta-analysis of  
937 genetic association studies in idiopathic recurrent spontaneous abortion. *Fertil. Steril.*  
938 **107**, 150-159.e2 (2017).
- 939 105. T. Laisk, *et al.*, The genetic architecture of sporadic and multiple consecutive miscarriage.  
940 *Nat. Commun.* **11**, 1–12 (2020).
- 941 106. S. Buonaiuto, *et al.*, Prioritization of putatively detrimental variants in euploid  
942 miscarriages. *medRxiv*, 2021.01.02.20248961 (2021).
- 943 107. M. Cai, N. Lin, L. Xu, H. Huang, Comparative clinical genetic testing in spontaneous  
944 miscarriage: Insights from a study in Southern Chinese women. *J. Cell. Mol. Med.*,  
945 jcm.16588 (2021).
- 946 108. L. Sekhon, J. Rodriguez-Purata, J. A. Lee, C. Briton-Jones, A. B. Copperman, Sexual  
947 dimorphism and implantation potential: is there a difference? *Fertil. Steril.* **106**, e23–e24  
948 (2016).
- 949 109. S. Pérez-Cerezales, *et al.*, Early sex-dependent differences in response to environmental  
950 stress. *Reproduction*, R39–R51 (2018).
- 951 110. T. Sun, *et al.*, Sexually dimorphic crosstalk at the maternal-fetal interface. *J. Clin.*  
952 *Endocrinol. Metab.* **105** (2020).
- 953 111. X. Xu, Y. Zhou, H. Wei, Roles of HLA-G in the Maternal-Fetal Immune Microenvironment.  
954 *Front. Immunol.* **11** (2020).
- 955 112. A. Boutin, *et al.*, First Trimester Screening for Fetal Aneuploidies Using Placental Growth



- 956 Factor: The Great Obstetrical Syndrome (GOS) Study. *J. Obstet. Gynaecol. Canada* **40**,  
957 1044–1049 (2018).
- 958 113. E. Zaragoza, R. Akolekar, L. C. Y. Poon, S. Pepes, K. H. Nicolaides, Maternal serum  
959 placental growth factor at 11–13 weeks in chromosomally abnormal pregnancies.  
960 *Ultrasound Obstet. Gynecol.* **33**, 382–386 (2009).
- 961 114. Y. Jin, *et al.*, ZBED1/DREF: A transcription factor that regulates cell proliferation (Review).  
962 *Oncol. Lett.* **20** (2020).
- 963 115. S. V. Hansen, S. Traynor, H. J. Ditzel, M. F. Gjerstorff, Human DREF/ZBED1 is a nuclear  
964 protein widely expressed in multiple cell types derived from all three primary germ  
965 layers. *PLoS One* **13** (2018).
- 966 116. T. Y. Chen, *et al.*, Genotoxic stress-activated DNA-PK-p53 cascade and autophagy  
967 cooperatively induce ciliogenesis to maintain the DNA damage response. *Cell Death*  
968 *Differ.* **28**, 1865–1879 (2021).
- 969 117. Y. Pan, *et al.*, Dysfunction of Shh signaling activates autophagy to inhibit trophoblast  
970 motility in recurrent miscarriage. *Exp. Mol. Med.* **53**, 52–66 (2021).
- 971 118. N. E. Banovich, *et al.*, Impact of regulatory variation across human iPSCs and  
972 differentiated cells. *Genome Res.* **28**, 122–131 (2018).
- 973 119. C. J. Hsiao, *et al.*, Characterizing and inferring quantitative cell cycle phase in single-cell  
974 RNA-seq data analysis. *Genome Res.* **30**, 611–621 (2020).
- 975 120. M. J. Aryee, *et al.*, Minfi: A flexible and comprehensive Bioconductor package for the  
976 analysis of Infinium DNA methylation microarrays. *Bioinformatics* **30**, 1363–1369 (2014).
- 977 121. S. E. Castel, P. Mohammadi, W. K. Chung, Y. Shen, T. Lappalainen, Rare variant phasing  
978 and haplotypic expression from RNA sequencing with phASER. *Nat. Commun.* **7**, 1–6  
979 (2016).
- 980 122. M.-A. Bray, M. S. Vokes, A. E. Carpenter, “Using CellProfiler for Automatic Identification  
981 and Measurement of Biological Objects in Images” in *Current Protocols in Molecular*  
982 *Biology*, (John Wiley & Sons, Inc., 2015), pp. 14.17.1–14.17.13.
- 983 123. M. Martin, “Cutadapt removes adapter sequences from high-throughput sequencing  
984 reads” (2011).
- 985 124. D. Kim, B. Langmead, S. L. Salzberg, HISAT: A fast spliced aligner with low memory  
986 requirements. *Nat. Methods* **12**, 357–360 (2015).
- 987 125. A. Frankish, *et al.*, GENCODE reference annotation for the human and mouse genomes.  
988 *Nucleic Acids Res.* **47**, D766–D773 (2019).
- 989 126. Y. Liao, G. K. Smyth, W. Shi, FeatureCounts: An efficient general purpose program for  
990 assigning sequence reads to genomic features. *Bioinformatics* **30**, 923–930 (2014).
- 991 127. M. I. Love, W. Huber, S. Anders, Moderated estimation of fold change and dispersion for  
992 RNA-seq data with DESeq2. *Genome Biol.* **15** (2014).
- 993 128. J. T. Leek, W. E. Johnson, H. S. Parker, A. E. Jaffe, J. D. Storey, The SVA package for  
994 removing batch effects and other unwanted variation in high-throughput experiments.  
995 *Bioinformatics* **28**, 882–883 (2012).
- 996 129. G. Yu, L.-G. Wang, Y. Han, Q.-Y. He, clusterProfiler: an R Package for Comparing Biological  
997 Themes Among Gene Clusters. *Omi. A J. Integr. Biol.* **16**, 284–287 (2012).
- 998 130. D. Maglott, J. Ostell, K. D. Pruitt, T. Tatusova, Entrez gene: Gene-centered information at  
999 NCBI. *Nucleic Acids Res.* **39**, D52 (2011).

Figure 1

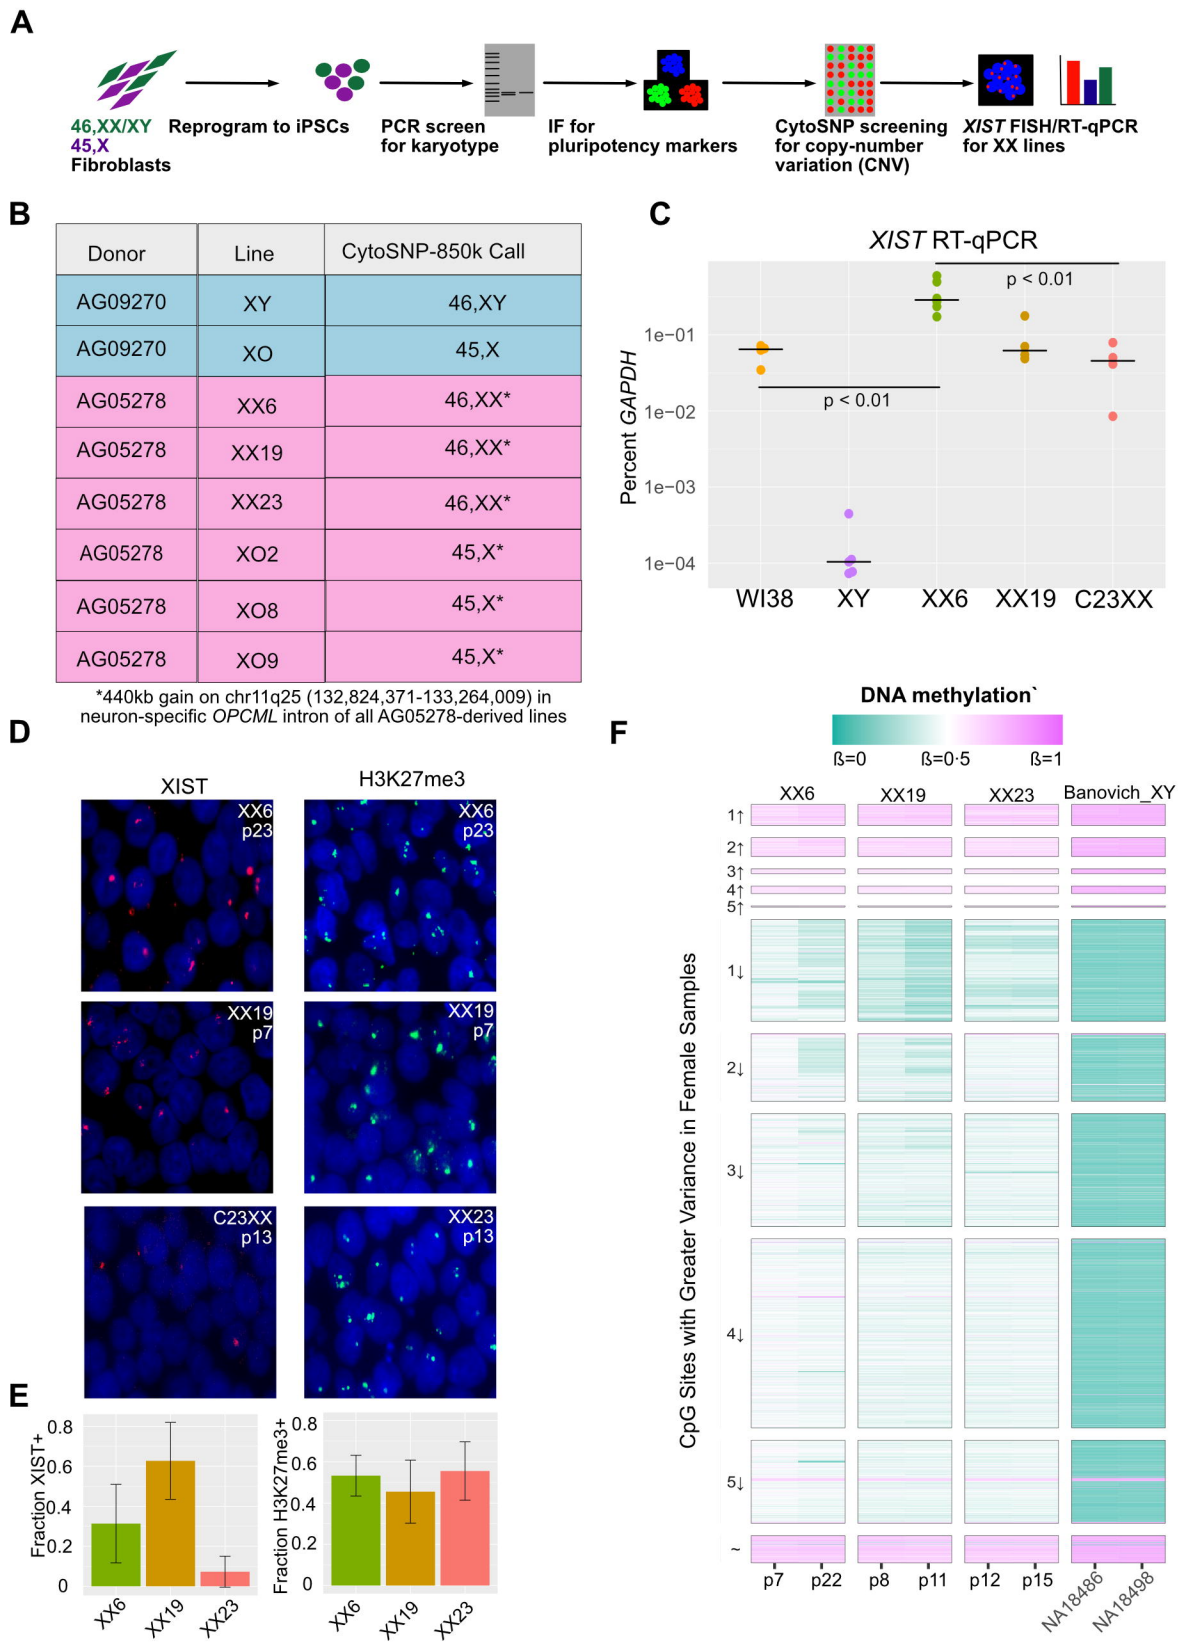



**Figure 2**

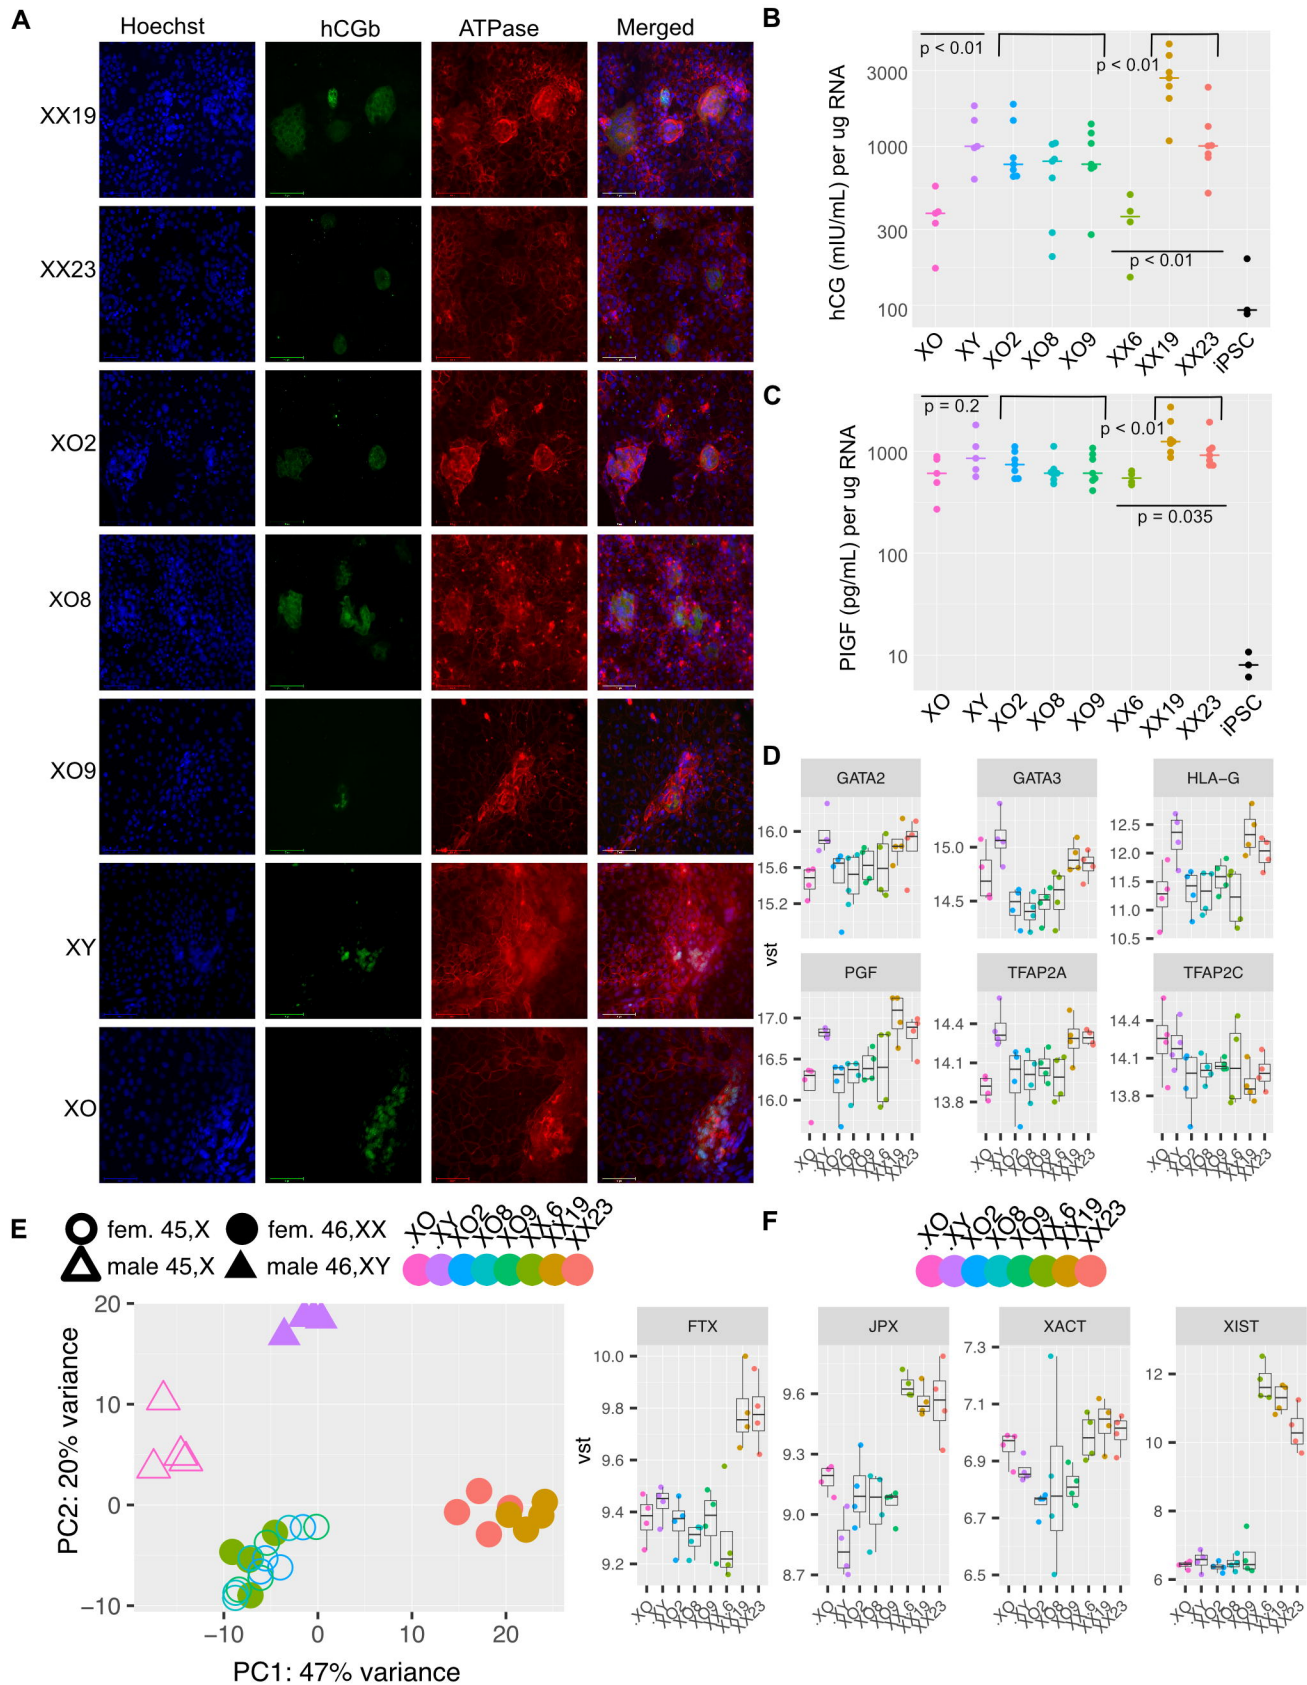

Figure 3

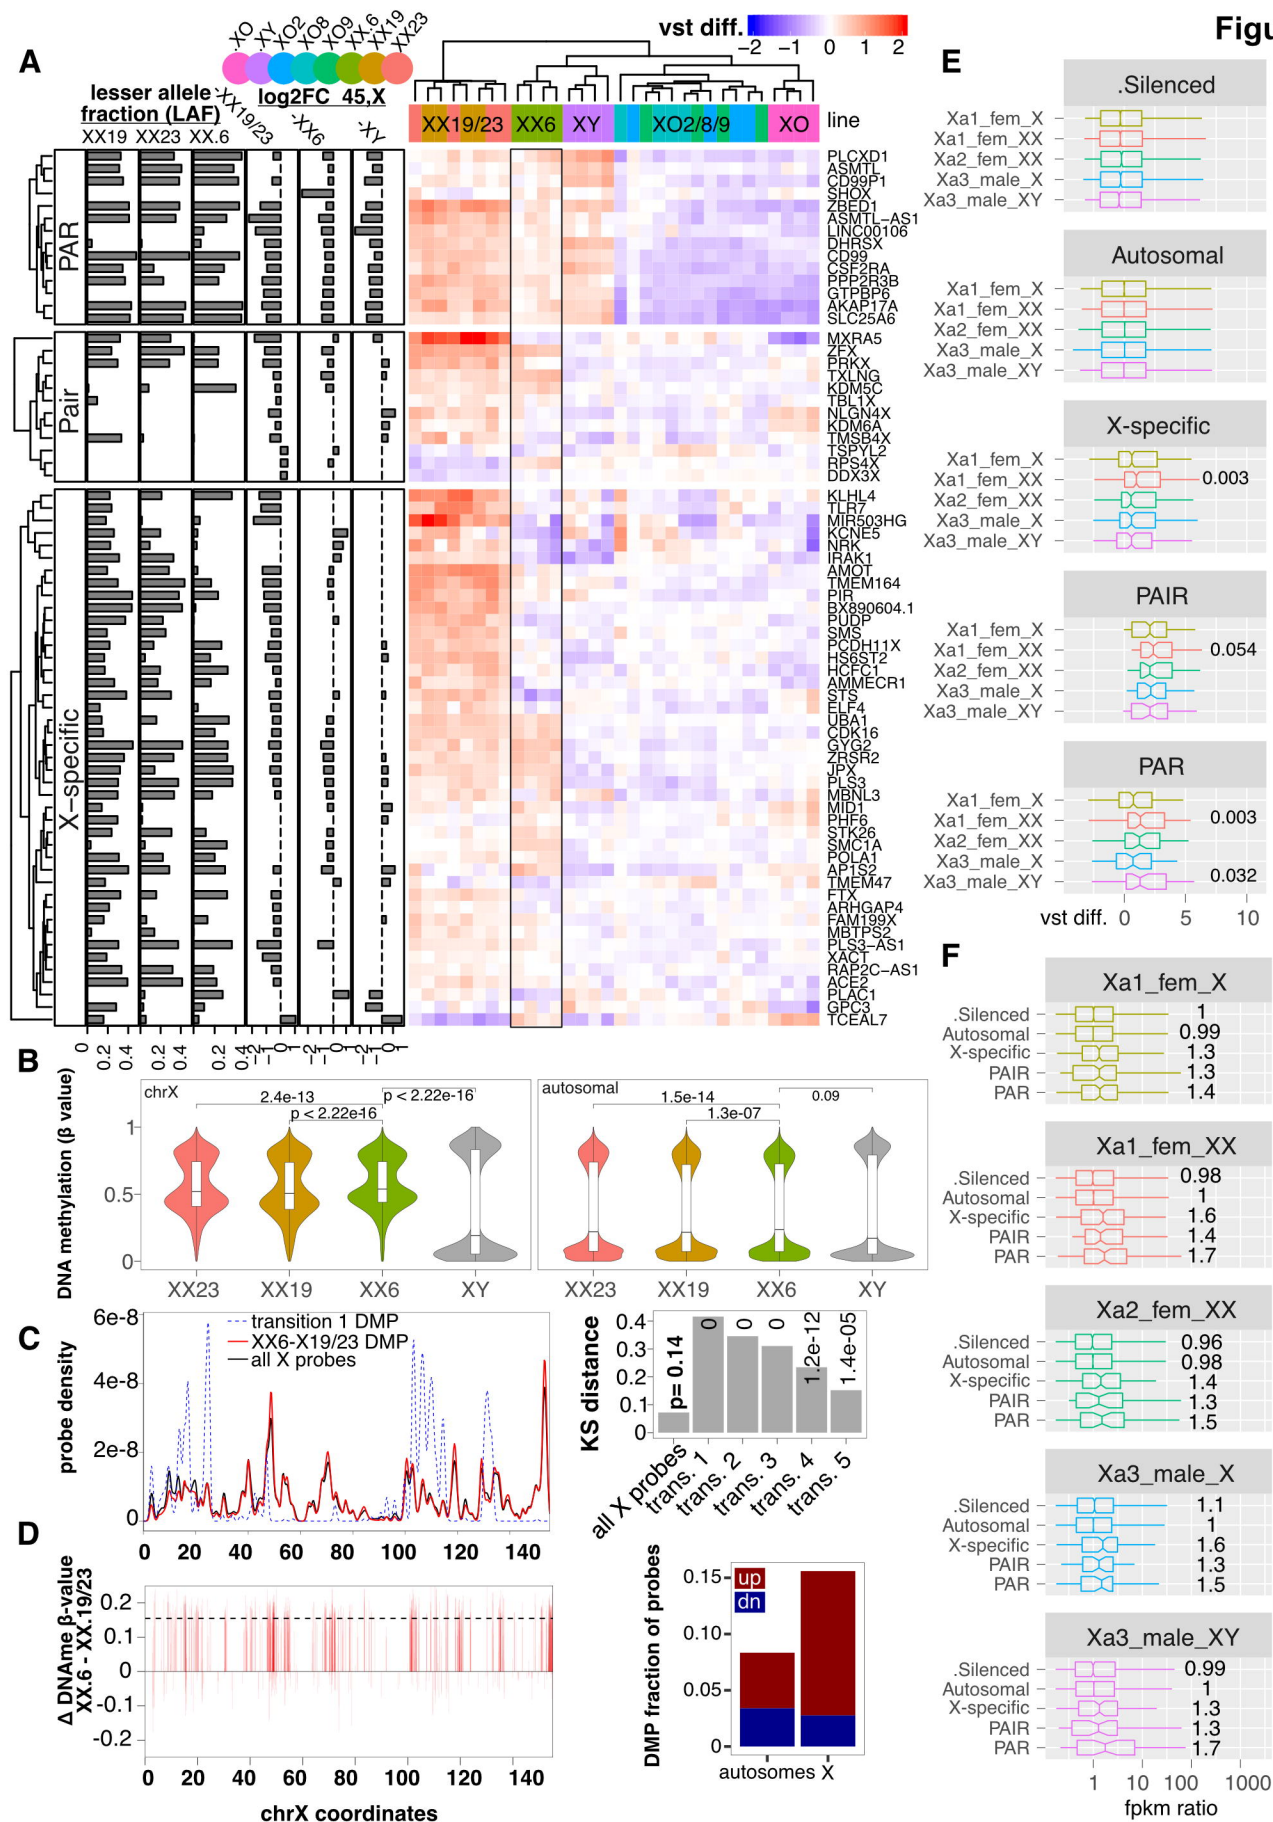



Figure 4

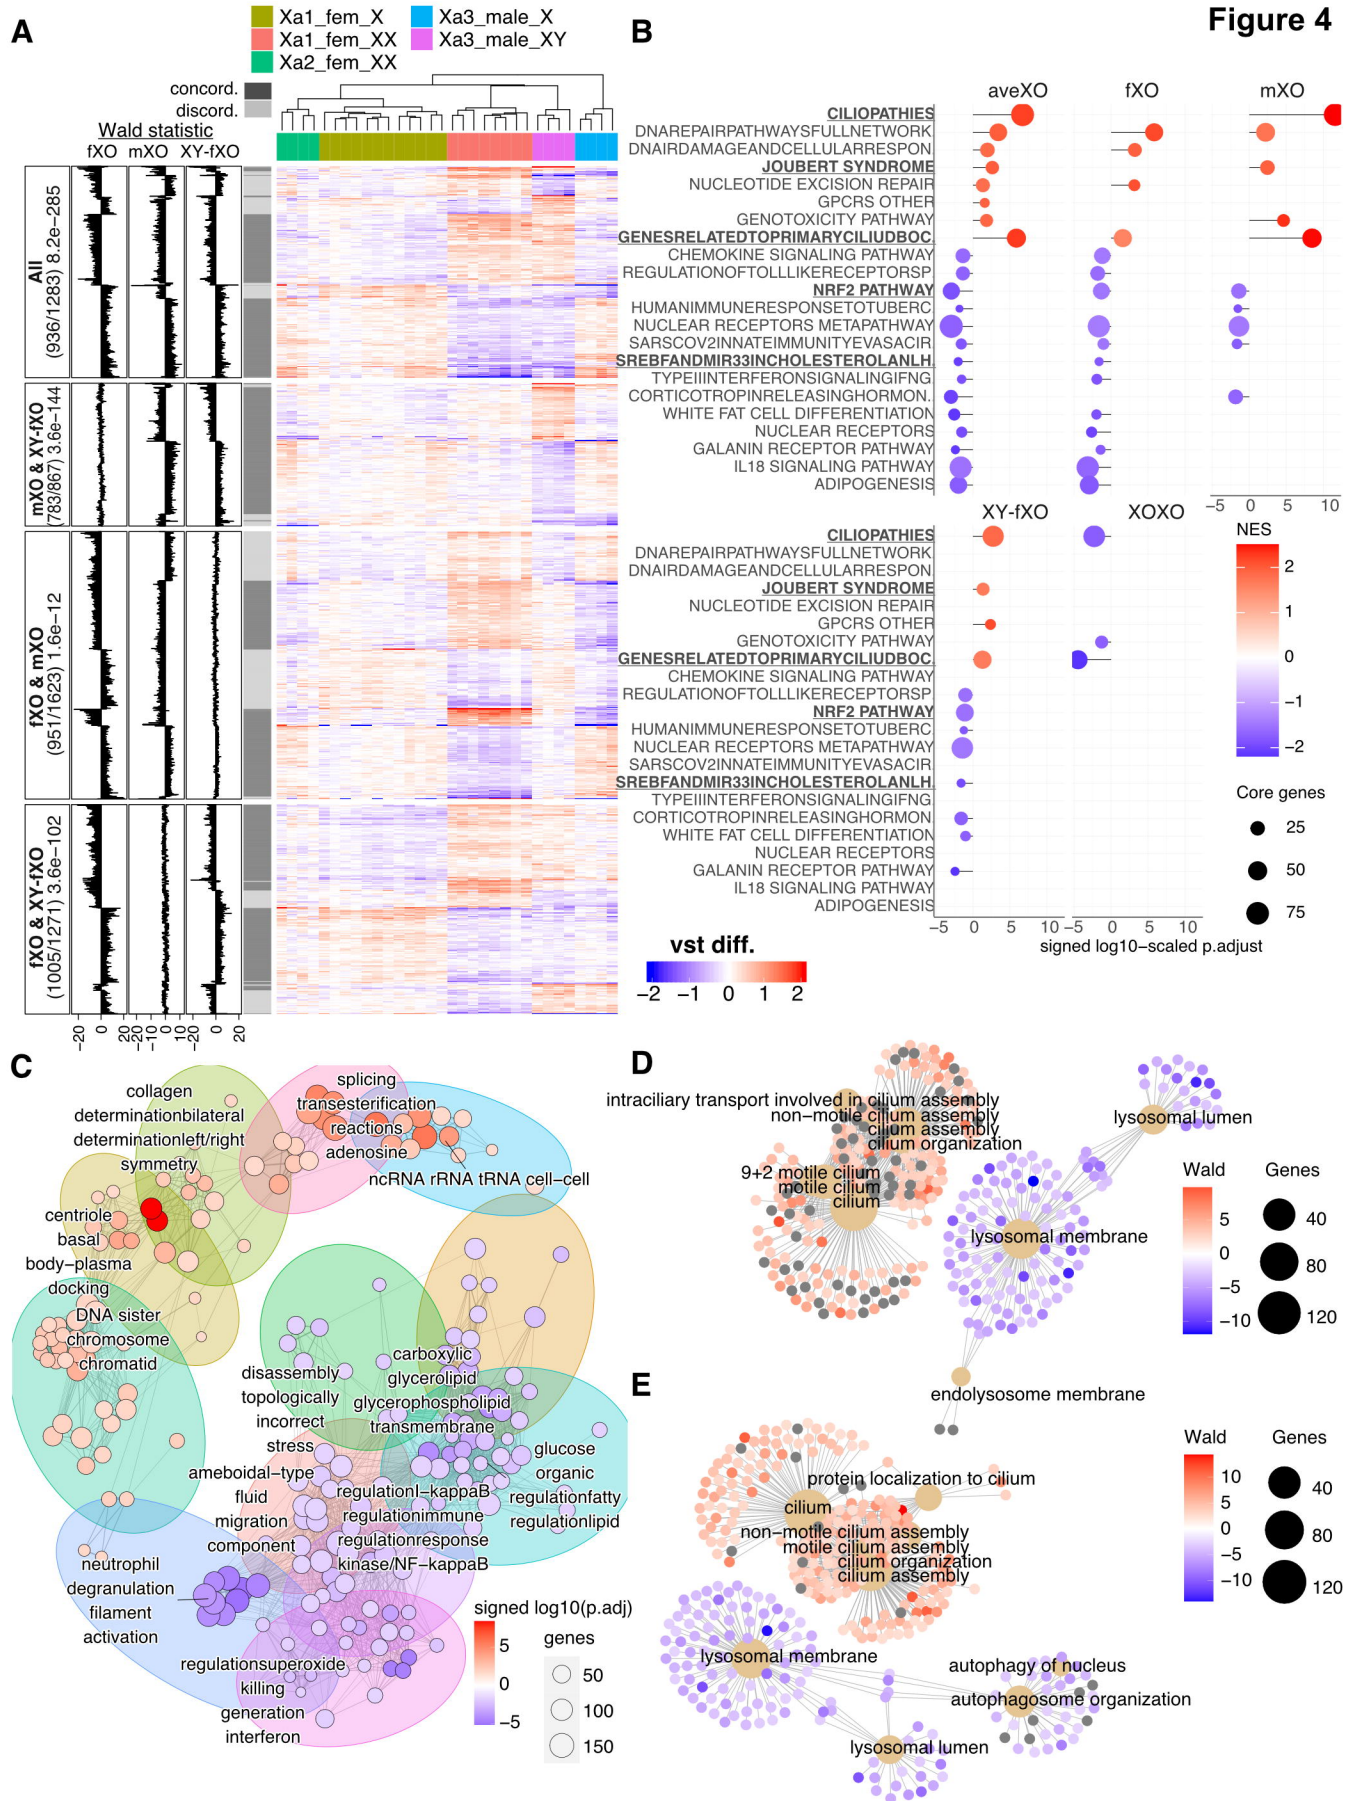

Figure 5

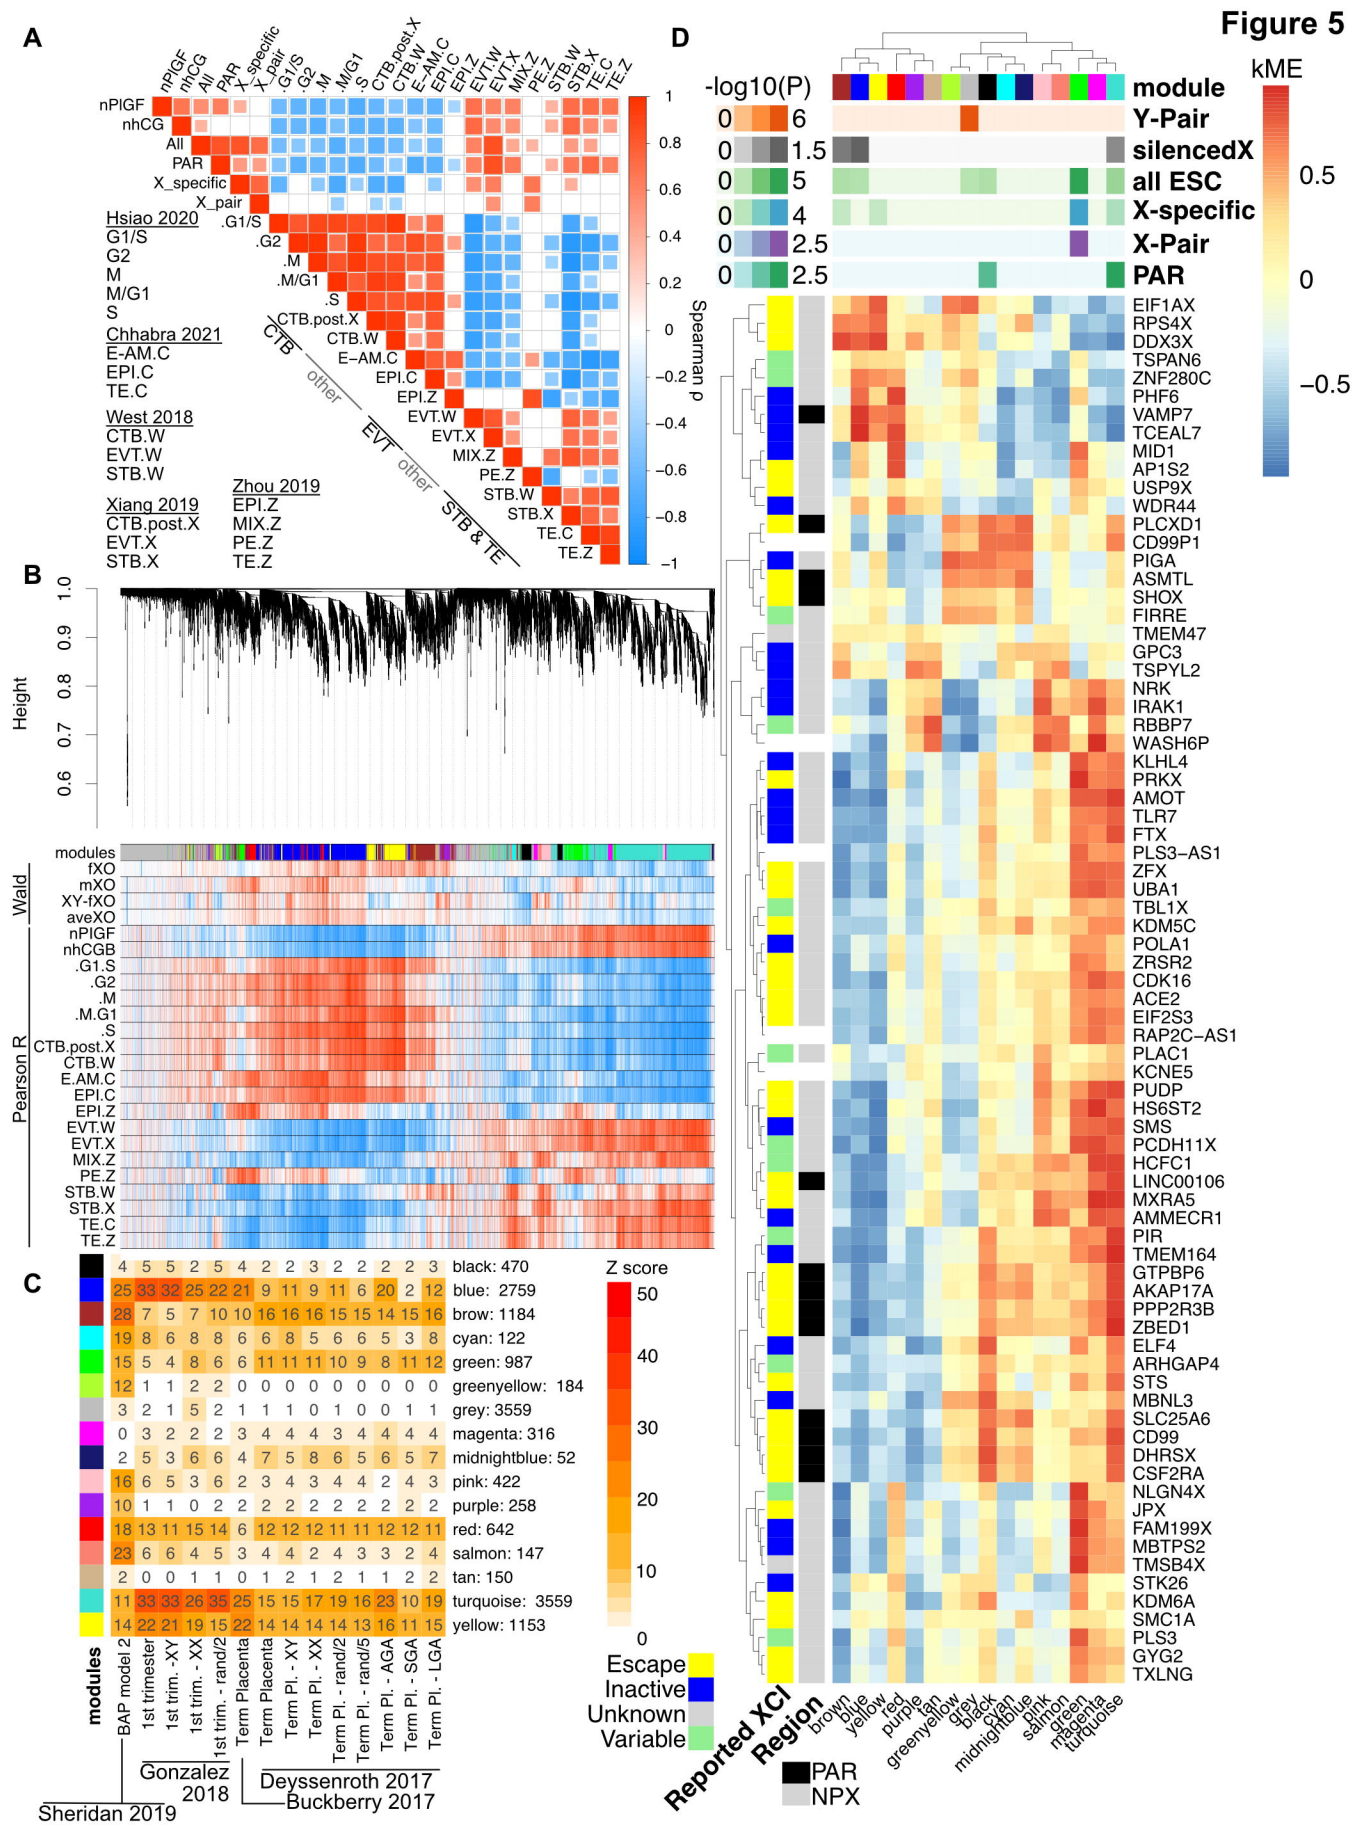

Source: https://www.biorxiv.org/content/biorxiv/early/2021/12/14/2021.12.13.472325.full.pdf
